1 **Asymmetric Hapln1a drives regionalised cardiac ECM expansion and promotes heart**  
2 **morphogenesis during zebrafish development**

3

4 Christopher J Derrick<sup>1</sup>, Juliana Sánchez-Posada<sup>1</sup>, Farah Hussein<sup>1</sup>, Federico Tessadori<sup>4</sup>, Eric JG  
5 Pollitt<sup>1</sup>, Aaron M Savage<sup>2</sup>, Robert N Wilkinson<sup>2,3</sup>, Timothy J Chico<sup>2</sup>, Fredericus J van Eeden<sup>1</sup>,  
6 Jeroen Bakkers<sup>4</sup>, Emily S Noël<sup>1+</sup>.

7

8 <sup>1</sup> Department of Biomedical Science, University of Sheffield, Western Bank, Sheffield, UK

9 <sup>2</sup> Department of Infection, Immunity and Cardiovascular Disease, University of Sheffield,  
10 Western Bank, Sheffield, UK

11 <sup>3</sup> Current address: School of Life Sciences, University of Nottingham, Queen's Medical Centre,  
12 Nottingham, UK

13 <sup>4</sup> Hubrecht Institute for Developmental and Stem Cell Biology, Uppsalalaan 8, Utrecht, NL

14 <sup>+</sup> Corresponding author: [e.s.noel@sheffield.ac.uk](mailto:e.s.noel@sheffield.ac.uk)

15

16 **Abstract**

17 The mature vertebrate heart develops from a simple linear cardiac tube during early  
18 development through a series of highly asymmetric morphogenetic processes including cardiac  
19 looping and chamber ballooning. While the directionality of heart morphogenesis is partly  
20 controlled by embryonic laterality signals, previous studies have suggested that these extrinsic  
21 laterality cues interact with tissue-intrinsic signals in the heart to ensure robust asymmetric  
22 cardiac morphogenesis. Using live *in vivo* imaging of zebrafish embryos we describe a left-  
23 sided, chamber-specific expansion of the extracellular matrix (ECM) between the myocardium  
24 and endocardium at early stages of heart morphogenesis. We use Tomo-seq, a spatial  
25 transcriptomic approach, to identify transient and regionalised expression of *hyaluronan* and

26 *proteoglycan link protein 1a (hapln1a)*, encoding an ECM cross-linking protein, in the heart  
27 tube prior to cardiac looping overlapping with regionalised ECM expansion. Loss- and gain-  
28 of-function experiments demonstrate that regionalised Hapln1a promotes heart morphogenesis  
29 through regional modulation of ECM thickness in the heart tube. Finally, we show that while  
30 induction of asymmetric *hapln1a* expression is independent of embryonic left-right  
31 asymmetry, these laterality cues are required to orient the *hapln1a*-expressing cells  
32 asymmetrically along the left-right axis of the heart tube.  
33 Together, we propose a model whereby laterality cues position *hapln1a* expression on the left  
34 of the heart tube, and this asymmetric Hapln1a deposition drives ECM asymmetry and  
35 subsequently promotes robust asymmetric cardiac morphogenesis.

36

## 37 **Introduction**

38 Congenital heart defects are the most common human birth abnormality, with an incidence of  
39 approximately 1% of live births (van der Linde et al. 2011; Hoffman & Kaplan 2002). These  
40 structural malformations arise due to abnormal morphogenesis and maturation of the heart  
41 during embryonic development. A key stage in cardiac development is when the heart  
42 transitions from a linear tube to an asymmetric organ, a process including initial looping  
43 morphogenesis of the tube and subsequent ballooning of the cardiac chambers. Correct cardiac  
44 morphogenesis is vital for ensuring normal blood flow through the heart, proper chamber and  
45 vessel alignment, valve formation and septation. Therefore early cardiac morphogenesis is a  
46 tightly controlled process, and requires coordination of heart-extrinsic signalling cues, cardiac  
47 growth and tissue-intrinsic changes in cell shape, mediated by cytoskeletal rearrangements  
48 (Desgrange et al. 2018).

49 The requirement for embryonic left-right signalling pathways in promoting directionality of  
50 heart morphogenesis is well established, with asymmetric Nodal signalling playing a key role

51 in driving rightward looping of the linear heart tube in multiple organisms (Levin et al. 1995;  
52 Lowe et al. 1996; Long 2003; Brennan et al. 2002; Toyozumi et al. 2005). However, while  
53 embryos with defective asymmetric Nodal signalling display disrupted directionality of heart  
54 looping, the heart still undergoes looping morphogenesis (Noël et al. 2013; Brennan et al.  
55 2002). This indicates that while extrinsic asymmetric cues provide directional information to  
56 the heart, regionalised intrinsic signals help to promote asymmetric morphogenesis. Supporting  
57 the model of tissue intrinsic heart looping, chick and zebrafish studies have demonstrated that  
58 heart tubes cultured *ex vivo* retain the ability to undergo aspects of morphogenesis without  
59 exposure to regionalised signalling or physical constraints from the embryo (Noël et al. 2013;  
60 Manning & McLachlan 1990). It is likely that the interplay of extrinsic and intrinsic  
61 regionalised signaling and cell behaviours ensure the coordination of directionality and  
62 morphogenesis required to shape the heart and orient it within the body (Desgrange et al. 2018).  
63 The developing heart tube is composed of two cell layers: an outer tube of myocardium  
64 surrounding an inner layer of specialised endothelial cells (endocardium). Separating these two  
65 layers is the cardiac jelly, a specialised extracellular matrix (ECM). Cardiac jelly consists of  
66 collagens, glycosaminoglycans and glycoproteins and plays a pivotal role in providing  
67 mechanical cues and modulating extracellular signalling in the heart during cardiac  
68 development (Rozario & DeSimone 2010; Daley & Yamada 2013). Classic embryological  
69 experiments initially demonstrated that the cardiac jelly is important for heart morphogenesis  
70 (Barry, 1948; Nakamura and Manasek, 1981), while more recent studies have begun to identify  
71 specific ECM constituents with distinct roles in heart development (Rotstein et al. 2018;  
72 Chowdhury et al. 2017; Rambeau et al. 2017; Patra et al. 2011; Strate et al. 2015; Mittal et al.  
73 2010; Tao et al. 2012; Wirrig et al. 2007; Trinh & Stainier 2004; Tsuda et al. 1998). Hyaluronic  
74 acid (HA) is a glycosaminoglycan with conserved roles in heart tube formation, cardiac  
75 morphogenesis and atrioventricular valve development (Camenisch et al. 2000; Smith et al.

76 2008; Chowdhury et al. 2017), suggesting a broad requirement for HA at various stages during  
77 cardiac development. However, the mechanisms by which the HA-rich ECM specifically  
78 promotes heart morphogenesis is unclear.

79 Recent studies in chick and mouse have reported that asymmetric ECM expansion in the  
80 mesoderm surrounding the gut tube promotes directional looping morphogenesis of the  
81 intestine (Sivakumar et al. 2018). This ECM expansion occurs through asymmetric  
82 modification of HA, raising interesting questions regarding the role of regional ECM  
83 remodeling and asymmetry in the morphogenesis of other tubular structures, including the  
84 heart.

85 In this study we demonstrate that the cardiac ECM of the zebrafish heart tube exhibits  
86 regionalised expansion prior to onset of looping morphogenesis, with an expanded ECM  
87 observed in both the left side and future atrium of the heart tube. Loss-of-function analyses  
88 demonstrate that this regionalised cardiac ECM expansion is dependent upon the ECM cross-  
89 linking protein Hyaluronan and Proteoglycan Link Protein 1a (Hapln1a), and that Hapln1a  
90 promotes heart morphogenesis. Finally, we show that while asymmetric *hapln1a* expression is  
91 independent of laterality cues, the axis of *hapln1a* asymmetry in the heart is dictated by  
92 embryonic laterality, and suggest a model where embryonic left-right asymmetry tightly  
93 defines the orientation of ECM asymmetry in the heart tube, and together these pathways  
94 promote asymmetric morphogenesis.

95

## 96 **Results**

97 *The cardiac ECM is asymmetrically expanded at early stages of heart looping morphogenesis.*

98 During cardiac development the myocardial and endocardial layers of the heart are separated  
99 by a specialised ECM, the cardiac jelly. We hypothesised that there may be regional differences  
100 in the ECM of the zebrafish heart tube which drive looping morphogenesis. To examine

101 regional ECM thickness in the heart tube we used live *in vivo* light-sheet microscopy to image  
102 quadruple transgenic zebrafish embryos at 26 hours post fertilisation (hpf).  
103 *Tg(myf7:lifeActGFP); Tg(fli1a:AC-TagRFP); Tg(lft2BAC:Gal4FF); Tg(UAS:RFP)* zebrafish  
104 express actin-tagged GFP in the myocardium (Reischauer et al. 2014) and actin-localised RFP  
105 in the endothelium including the endocardium (Savage et al. 2019), allowing visualisation of  
106 the two tissue layers in the heart tube. The *Tg(lft2BAC:Gal4FF); Tg(UAS:RFP)* double  
107 transgenic drives RFP in *lft2*-expressing cells, which comprises the dorsal myocardium of  
108 the heart tube at 26hpf (Fig 1A and Fig S1) (Smith et al. 2008; Baker et al. 2008). This  
109 combination of transgenes allowed imaging of optical cross sections through the heart tube at  
110 26hpf, just prior to onset of looping morphogenesis, and enabled dorsal-ventral axis orientation  
111 of the heart tube (Fig 1A-G, Supplemental Movie 1). We consistently observed an asymmetry  
112 in the extracellular space between the myocardial and endocardial layers of the heart in the  
113 atrium, with an apparent thickening of the ECM on the left side of the tube which is maintained  
114 throughout the cardiac cycle (Fig 1D, G). With this combination of transgenes, we could  
115 quantify the extracellular space between the two tissue layers of the heart tube and calculate  
116 the ECM asymmetry ratio (left ECM thickness divided by right ECM thickness, where a value  
117 of >1 indicates a left sided expansion). Using this method, we detected a reproducible  
118 expansion of the ECM in the left side of the heart tube (Fig 1H). Further characterisation also  
119 found that the left-sided ECM expansion is maintained in the atrium at 50hpf (Fig S2).  
120 Due to limited ability to image deeper cardiac tissue with sufficient resolution at 26hpf, we  
121 could only image the relatively superficially located venous pole/atrium of the heart tube in  
122 live embryos. Therefore, to determine whether ECM left-right asymmetry is restricted to the  
123 atrium of the heart tube or is maintained along the atrioventricular axis of the heart, we  
124 performed fixed tissue imaging. Previous studies have demonstrated that hyaluronic acid (HA)  
125 is present in the cardiac jelly during zebrafish heart development (Grassini et al. 2018;

126 Camenisch et al. 2000; Lagendijk et al. 2011). To visualise the HA-rich ECM, wild type  
127 embryos were injected with the HA sensor *ssNcan-GFP* (De Angelis et al. 2017) at the 1-cell  
128 stage, fixed at 26hpf, and the GFP signal detected by immunohistochemistry before imaging  
129 the entire heart tube as a z-stack using confocal microscopy (Fig 1I-K). Optical reslicing of z-  
130 stacks generated cross sections of the heart tube from the venous pole to the arterial pole,  
131 allowing us to quantify the width of the *ssNcan-GFP*-positive ECM in the heart tube on both  
132 left and right sides of the tube along the entire pole-to-pole length of the heart (Fig 1L-N). We  
133 confirmed that the ECM is thicker on the left side of the heart tube compared the right, however  
134 this left/right asymmetry appears to be more profound in the venous pole/future atrium than in  
135 the arterial pole/future ventricle (Fig 1N). By employing the same quantitative analysis of ECM  
136 ratio as used in live imaging experiments, we observed that the ECM indeed exhibits the  
137 highest level of asymmetry in the future atrial region of the heart tube (Fig 1O). Together these  
138 data demonstrate that the heart tube exhibits an asymmetrically expanded ECM prior to onset  
139 of looping morphogenesis.

140

141 *hapln1a* exhibits regionalised cardiac expression prior to heart morphogenesis.

142 The asymmetric expansion of the cardiac ECM could be due to regionalised synthesis of ECM  
143 components. However, we did not observe any clear asymmetry in levels of HA deposition in  
144 the cardiac ECM in either live embryos injected with the *ssNcan-GFP* sensor (Fig S3) or in  
145 fixed hearts (Fig 1I-K). We also did not find any anteroposterior asymmetry in the heart disc,  
146 or left-right asymmetry in the heart tube in the expression of *hyaluronan synthase 2* (*has2*, the  
147 major HA producing enzyme), *chondroitin sulfate synthase 1* (*chsyl*) or the ECM  
148 proteoglycans *versican* (*vcana/b*), *aggrecan* (*acana/b*), all of which have previously been  
149 implicated in heart development (Peal et al. 2009; Camenisch et al. 2000; Smith et al. 2008;  
150 Rambeau et al. 2017; Mittal et al. 2019; Mjaatvedt et al. 1998) (Fig S3), suggesting that

151 regionalised synthesis of these proteins does not cause ECM asymmetry. We therefore  
152 hypothesised that a protein required either for HA modification or cross-linking may be  
153 regionally expressed in the heart tube prior to looping morphogenesis and promote regionalised  
154 ECM expansion.

155 To identify candidate genes which modulate cardiac ECM expansion, we took a genome-wide  
156 approach to identify genes expressed in the heart tube at 26hpf, prior to the onset of looping  
157 morphogenesis. Since we observed the strongest left-sided ECM expansion in the putative  
158 atrium, as well as a generally more expanded ECM at the venous pole of the heart compared  
159 to the arterial pole, we used the previously described Tomo-seq technique to generate a  
160 regionalised map of gene expression from pole-to-pole in the heart tube (Junker et al. 2014;  
161 Burkhard & Bakkers 2018) (Figure 2A). We sectioned two individual hearts along the  
162 atrioventricular axis, identifying 6,787 and 8,916 expressed genes (see Supplementary Tables  
163 2-5), of which approximately half were expressed in more than one section. By identifying  
164 which sections express the atrial marker *myh6* (*myosin, heavy chain 6, cardiac muscle, alpha*)  
165 we defined a subset of tissue sections with atrial identity. We subsequently filtered genes that  
166 are up-regulated in atrial sections compared to ventricular sections in both hearts and examined  
167 this list for genes which may be implicated in ECM modification.

168 Using this approach we identified *hyaluronan and proteoglycan link protein 1a* (*hapln1a*,  
169 formerly *crit1*) as a candidate that might drive regionalised ECM expansion (Fig 2B). The  
170 Hapln family of proteins are secreted into the ECM where they crosslink HA to proteoglycans  
171 (Spicer et al. 2003), suggesting Hapln1a may act to modify the cardiac ECM environment.  
172 Furthermore, *Hapln1* mutant mice exhibit heart malformations including septal defects and  
173 perturbations of the inflow and outflow tracts, consistent with abnormal heart morphogenesis  
174 (Wirrig et al. 2007).

175 mRNA *in situ* hybridisation analysis revealed that *hapln1a* is expressed in the posterior of the  
176 heart disc and the cardiac cone (Fig 2C, D). At 26hpf *hapln1a* expression is upregulated on the  
177 left side of the cardiac tube with elevated levels of expression of *hapln1a* in the future atrium  
178 compared to the future ventricle, recapitulating the regionalised ECM expansion we observe  
179 in the heart (compare Fig 2E and Fig 1K). This is in line with recent studies demonstrating that  
180 the posterior compartment of the cardiac disc is re-positioned to the left side of the heart tube  
181 (Guerra et al. 2018). By 50hpf *hapln1a* expression is restricted to very low levels in the  
182 atrioventricular canal, the precursor to the atrioventricular valve (Fig 2F). Fluorescent *in situ*  
183 hybridization reveals *hapln1a* is expressed in the myocardium (Fig 2G-I), while analysis of  
184 Hapln1a protein localisation confirms it is deposited in the ECM (Fig 2J-L). Despite the  
185 absence of *hapln1a* expression in the heart at 50hpf (Fig 2F), Hapln1a protein is maintained in  
186 the ECM at 50hpf (Fig 2M-Q), suggesting that the ECM environment established during early  
187 stages prior to heart tube formation is maintained during heart development and may be  
188 important for continued cardiac morphogenesis.

189

190 *Hapln1a* is required for heart morphogenesis and promotes ECM expansion.

191 To determine whether Hapln1a is required for cardiac morphogenesis we used CRISPR-Cas9-  
192 mediated genome editing to generate *hapln1a* mutants. We injected a pair of guide RNAs  
193 targeting approximately 200bp upstream of the translation-initiating ATG and immediately  
194 downstream of the ATG, allowing us to excise the putative promoter of *hapln1a* (Fig S4). We  
195 recovered F1 adult fish carrying two deletions; a 187bp deletion (*hapln1a*<sup>Δ187</sup>) and a 241bp  
196 deletion (*hapln1a*<sup>Δ241</sup>), both of which remove the initiating ATG and upstream sequence, and  
197 established both as stable lines at F2. To confirm the deletions removed the *hapln1a* promoter  
198 and prevented transcription, *hapln1a* expression was analysed at 26hpf in F3 mutant embryos  
199 for each allele. Homozygous *hapln1a* promoter mutants of either allele exhibit a complete loss



200 of *hapln1a* expression at 26hpf compared to wild type embryos (Fig 3C, E, Fig S4),  
201 demonstrating successful deletion of the *hapln1a* promoter, and confirming the promoter  
202 mutants as loss of function models. Furthermore, embryos heterozygous for a *hapln1a*  
203 promoter mutation also exhibit a reduction in levels of transcript compared to wild type siblings  
204 (Fig 3D, Fig S4). Analysis of heart development in *hapln1a*<sup>Δ241</sup> mutants at 50hpf did not reveal  
205 striking abnormalities in cardiac morphogenesis (Fig 3F-H), however we did observe  
206 occasionally mispositioned and malformed atria. To investigate this further, we examined  
207 morphology of individual chambers at 50hpf by *in situ* hybridization analysis of the ventricular  
208 marker *myh7l* (*myosin heavy chain 7-like*) and the atrial marker *myh6* (Fig 3I-N).  
209 Quantification of either whole heart size, or individual chamber size revealed a significant  
210 reduction in whole heart size in *hapln1a*<sup>Δ241</sup> mutants when compared to wild type siblings (Fig  
211 3R), and a mild reduction in atrium size (Fig 3S). We observed a similar significant reduction  
212 in atrial size in the second *hapln1a*<sup>Δ187</sup> allele (Fig S4). To quantify cardiac morphology at 50hpf  
213 we defined the looping ratio, a quotient of the looped and linear distances (Fig S4 and  
214 Methods). Although homozygous *hapln1a* mutants exhibit a reduction in cardiac size, we  
215 observed no significant reduction in looping ratio (Fig 3U, Fig S4).  
216 To assess the impact of loss of *hapln1a* on continued morphogenesis of the heart we used live  
217 light sheet imaging of *Tg(myh7:lifeActGFP); Tg(fli1a:AC-TagRFP)* transgenic embryos,  
218 acquiring 3D images of the heart at 72hpf. We found that *hapln1a*<sup>Δ241</sup> mutant hearts appear  
219 dysmorphic at 72hpf, with abnormally positioned atria and disrupted heart looping compared  
220 to wild type (Fig 3O-Q). Together this demonstrates that similar to mouse, *hapln1a* is required  
221 for cardiac morphogenesis.  
222 Since Hapln1 functions as an ECM binding protein and its localisation recapitulates the  
223 regionalised ECM expansion in the heart tube prior to heart morphogenesis, we hypothesized  
224 that Hapln1a promotes cardiac morphogenesis by driving regionalised ECM expansion in the

225 heart. Since both *hapln1a* promoter deletion alleles carry the *Tg(myl7:lifeActGFP)* transgene,  
226 this prevented analysis of ECM width throughout the heart tube of *hapln1a* mutants using the  
227 *ssNcan-GFP* HA sensor. Therefore, to examine ECM asymmetry in the heart tube upon loss  
228 of *hapln1a*, we injected a morpholino (MO) against *hapln1a* into zebrafish embryos at the 1-  
229 cell stage together with a *tp53* MO control and the *ssNcan-GFP* HA sensor and assessed ECM  
230 expansion in the heart tube at 26hpf. Analysis of Hapln1a protein levels in *hapln1a* morphants  
231 confirms successful blocking of Hapln1a translation in the morphants (Fig S5). Control  
232 embryos injected with *tp53* MO demonstrate the regionalised ECM expansion previously  
233 observed, with a left-sided expansion of the ECM (Fig 4A-B), and a higher level of ECM  
234 expansion in the atrium versus the ventricle (Fig 4C). Embryos injected with *hapln1a* MO +  
235 *tp53* MO did not exhibit either atrial or left-sided ECM expansion (Fig 4A, B, D), suggesting  
236 that Hapln1a drives regionalised ECM expansion in the heart tube. Furthermore, light sheet  
237 imaging of *Tg(myl7:lifeActGFP); Tg(fli1a:AC-TagRFP)* transgenic embryos at 72hpf revealed  
238 that the cardiac ECM remains asymmetrically expanded in the atrium of wild type siblings (Fig  
239 4E,G,I), but that similar to the loss of ECM asymmetry in the heart tube of *hapln1a* morphants,  
240 asymmetric ECM expansion is lost in *hapln1a* mutant hearts at 72hpf (Fig 4F,H,J). Together  
241 this supports a role for Hapln1a in regionally regulating the size of the cardiac ECM to promote  
242 normal cardiac morphogenesis.

243

#### 244 *Hapln1a* and HA interact to drive heart morphogenesis

245 Hapln1a is a member of a family of ECM binding proteins which crosslink hyaluronan with  
246 proteoglycans in the ECM (Spicer et al. 2003). Since *hapln1a* is transiently expressed at cardiac  
247 disc and early tube stage, this suggests that the cardiac ECM that drives continued  
248 morphogenesis of the heart is established at early stages of heart development and requires the  
249 interaction of Hapln1a with hyaluronic acid. To interrogate the temporal requirements for HA

250 in heart looping, we applied the HA synthesis inhibitor 4-Methylumbelliferone (4-MU  
251 (Nakamura et al. 1997; Ouyang et al. 2017)) to embryos prior to the onset of heart tube  
252 formation at 18hpf, and either washed the drug off at 22hpf, or left the embryos to develop to  
253 50hpf, when we assessed heart looping morphology. Inhibiting HA synthesis from cardiac disc  
254 stage (18hpf) until 50hpf often arrested heart development mid-way during tube formation (Fig  
255 S6), a more profound phenotype than that observed in *has2* zebrafish morphants or *Has2* mouse  
256 mutants (Smith et al. 2008; Camenisch et al. 2000). However, inhibition of HA synthesis during  
257 the short time window between cardiac disc (18hpf) and cardiac cone (22hpf) stage, prior to  
258 tube formation, resulted in normal tube formation but a specific disruption to heart looping  
259 morphogenesis (Fig S6). This supports the hypothesis that HA synthesised prior to formation  
260 of the heart tube is required for looping morphogenesis of the heart.

261 Having demonstrated a requirement for HA synthesis for heart morphogenesis during early  
262 cardiac development when *hapln1a* expression is initiated, we wanted to confirm the  
263 interaction of *hapln1a* and HA in heart looping morphogenesis. Injection of sub-phenotypic  
264 doses of morpholinos targeting either *has2* or *hapln1a* did not result in significant defects in  
265 cardiac morphology at 48hpf (Fig S6). However, co-injection of both *has2* and *hapln1a*  
266 morpholinos results in profound defects in heart morphology at 48hpf (Fig S6), including a  
267 reduction in heart looping ratio, and abnormal atrial morphology. This more profound  
268 phenotype than that observed by either injection of *hapln1a* MO + *tp53* MO, *has2* MO + *tp53*  
269 MO, 4MU treatment or deletion of the *hapln1a* promoter, suggesting that while timely HA  
270 signaling drives heart morphogenesis subsequent to tube formation, *hapln1a* is an important  
271 regional modulator of this process.

272

273 While analysis of *hapln1a* mutants demonstrates a requirement for Hapln1a in heart  
274 development (Fig 3), we wished to investigate whether the regionalization of *hapln1a*

275 expression is important for cardiac morphogenesis. We generated a DNA construct in which  
276 the full length *hapln1a* coding sequence is driven by the pan-myocardial *myl7* (*myosin light*  
277 *chain 7*) promoter, flanked by Tol2 transposon sites to allow integration into the genome (Fig  
278 5A). We co-injected *myl7:hapln1a* DNA with *tol2* transposase mRNA at the 1-cell stage and  
279 analysed both *myl7* and *hapln1a* expression at 50hpf, allowing us to visualize heart morphology  
280 alongside assessing the extent of *hapln1a* misexpression (Fig 5B,C). We quantified the looping  
281 ratio (Fig S4), as well as the percentage coverage of *hapln1a* expression in the whole heart and  
282 plotted percentage coverage against looping ratio (Fig 5D). We found that increasing the  
283 domain of *hapln1a* expression in the heart results in a reduction in looping morphogenesis (Fig  
284 5D), suggesting that regionalised expression of *hapln1a* in the heart is important for proper  
285 cardiac morphogenesis. Since *hapln1a* is expressed at higher levels in the atrium than the  
286 ventricle and ECM asymmetry is more robust in the atrium, we hypothesized that *hapln1a*  
287 misexpression in each chamber may impact differently on heart morphogenesis. We quantified  
288 *hapln1a* misexpression in each chamber by calculating the percentage of the chamber which  
289 expresses *hapln1a* (Fig 5E-I), and found that while misexpression of *hapln1a* in the ventricle  
290 did not impact upon heart morphogenesis (Fig 5J), misexpression of *hapln1a* in the atrium  
291 resulted in abnormal cardiac morphogenesis (Fig 5K). This suggests that spatially-restricted  
292 *hapln1a* expression in the atrium drives cardiac morphogenesis.

293

294 Finally, since *Hapln1a* is asymmetrically expressed on the left side of the heart tube, and is  
295 required for heart morphogenesis, we hypothesized that it may contribute to a previously-  
296 described tissue-intrinsic mechanism of heart looping morphogenesis (Noël et al. 2013) and  
297 thus is expressed independent of embryonic left-right asymmetry cues. During early  
298 somitogenesis the Kupffer's Vesicle (KV) is required to establish left-sided signalling in the  
299 embryo (Essner 2005). Embryos with mutations in *pkd2* (*polycystic kidney disease 2*), which

300 is required for KV function (Schottenfeld et al. 2007; Roxo-Rosa et al. 2015) exhibit defects  
301 in left-right asymmetry, including a disruption to normal leftward displacement of the heart  
302 tube (Schottenfeld et al. 2007). We hypothesised that induction of *hapln1a* expression occurs  
303 independent of embryonic laterality cues, but that asymmetric positioning of *hapln1a*-  
304 expressing cells in the heart tube may be tightly linked to the direction of heart tube position,  
305 and therefore dictated by embryonic left-right asymmetry. We analysed *hapln1a* expression  
306 in an incross of *pkd2<sup>hu2173</sup>* heterozygotes and found that consistent with our hypothesis *hapln1a*  
307 is always expressed in the posterior of the heart disc in *pkd2<sup>hu2173</sup>* mutants at 22hpf (Fig 6D),  
308 demonstrating that initiation of *hapln1a* expression is laterality independent. Importantly, at  
309 26hpf we observed that positioning of *hapln1a*-expressing cells is dependent upon cardiac  
310 position – in embryos where the heart is positioned to the right, *hapln1a* is upregulated on the  
311 right side of the tube, whereas if the heart remains midline, *hapln1a* does not exhibit a clear  
312 left-right asymmetry in up-regulation (Fig 6A-C, E). These data support a model where  
313 laterality cues do not initiate *hapln1a* expression but are required for its subsequent position in  
314 the heart tube. To further investigate our model we analysed Hapln1a protein localisation in  
315 *spaw* mutant embryos, which lack asymmetric Nodal expression prior to asymmetric organ  
316 morphogenesis (Noël et al. 2013). *spaw* mutant embryos exhibit midline hearts at 26hpf and  
317 Hapln1a is no longer positioned on the left side of the heart tube as observed in sibling embryos,  
318 but instead is secreted into the cardiac ECM on the ventral face of the heart (Figure 6F-M).  
319 Together, we propose a model where initiation of *hapln1a* expression in the posterior cardiac  
320 disc is independent of KV-based laterality cues, but the subsequent cell movements which  
321 occur during heart tube formation reposition this population of cells to the left side of the heart,  
322 dictating the axis of ECM asymmetry in the heart tube (Guerra et al. 2018). Therefore,  
323 embryonic laterality positions the regionally specialized ECM in the heart tube, ensuring that

324 directionality and growth of the heart are tightly coordinated to fine tune cardiac  
325 morphogenesis. (Figure 6N).

326

## 327 **Discussion**

328 Our data show that prior to heart looping morphogenesis in zebrafish, the heart tube exhibits  
329 regionalised ECM expansion that is dependent upon localised expression of the ECM binding  
330 protein *hapln1a* and this is required to promote proper cardiac morphogenesis. Our findings  
331 build upon previous studies showing that *Hapln1* mutant mouse embryos exhibit structural  
332 cardiac malformations consistent with abnormal early cardiac morphogenesis (Wirrig et al.  
333 2007). While that study describes expression of *Hapln1* in the valve leaflets at later stages of  
334 heart development, it does not address a potentially conserved role for transiently asymmetric  
335 *Hapln1* expression at earlier stages of heart development. Zebrafish have two *hapln1* paralogs,  
336 and each gene has a very distinct expression profile in the heart during development, with  
337 *hapln1b* being expressed primarily in the endocardium and atrioventricular canal (data not  
338 shown). Thus zebrafish provide an opportunity to define tissue-specific requirements for  
339 *Hapln1* function in either the myocardium or endocardium during cardiac morphogenesis,  
340 dissecting better the specific roles for *Hapln1* in cardiac development.

341 *hapln1a* mutants exhibit mild defects in cardiac morphology at embryonic stages, with atrial  
342 morphology predominantly affected. Interestingly, the only other gene shown to be expressed  
343 in the posterior cardiac disc/left heart tube in zebrafish is *meis2b* (Guerra et al. 2018). Analysis  
344 of *meis2b* mutants revealed defects in atrial morphology at juvenile and adult stages, supporting  
345 our conclusion that early anterior-posterior asymmetry in the heart disc/left-right asymmetry  
346 in the heart tube are important for continual cardiac morphogenesis. However, contrary to our  
347 study which reveals a reduced atrial size in *hapln1a* mutants, *meis2b* mutant adult zebrafish  
348 exhibit an enlarged atrium (Guerra et al. 2018) suggesting that while they are expressed in the

349 same domain, these two genes regulate atrial morphogenesis differently. *hapln1a* mutants are  
350 adult viable (data not shown), therefore it would be interesting to determine whether the atrium  
351 remains underdeveloped in *hapln1a* mutants, or whether they also develop a hyperproliferative  
352 atrial hypertrophy phenotype by adulthood.

353 A major role of the ECM in tissue morphogenesis is to provide structural or biomechanical  
354 cues to neighbouring tissues. While *hapln1a* is expressed prior to tube formation and during  
355 very early stages of looping morphogenesis only, Hapln1a protein persists in the cardiac jelly  
356 even after the heart has undergone initial looping morphogenesis (Fig 2). Together with our  
357 data demonstrating that HA synthesis is required prior to heart tube formation to promote  
358 cardiac morphogenesis (Fig S6), this suggests that the ECM environment generated early  
359 during heart development is crucial for continual and/or maintenance of chamber  
360 morphogenesis. Interestingly, recent studies have demonstrated that Hapln1 is the key element  
361 required for tissue folding in the human neocortex, and that HA is required to maintain the  
362 architecture of the tissue after folding has occurred (Long et al. 2018). In light of this, we  
363 propose that formation of the specific ECM environment at cardiac disc stage is required to  
364 ensure the heart maintains correct shape as it undergoes early looping morphogenesis.  
365 Alternatively, Hapln1a-mediated cross-linking may modulate regional stiffness of the cardiac  
366 ECM. Differential matrix stiffness has been shown to regulate a wide variety of cellular  
367 processes which contribute to general tissue morphogenesis (Jansen et al. 2017; Wells 2008;  
368 Hannezo & Heisenberg 2019), as well as regulating cardiomyocyte form and function (Wan et  
369 al. 2019; Bhana et al. 2010; Ingber 2002; Majkut et al. 2013).

370 In addition to provision of mechanical cues to the surrounding cells, the ECM is also implicated  
371 in modulation of diffusion and availability of extracellular signalling molecules (Ohkawara et  
372 al. 2002; Chen et al. 2007; Müller & Schier 2011). It is therefore tempting to speculate that the

373 specific ECM environment allows precise regionalised cellular responses to pan-cardiac or  
374 chamber specific signalling pathways.

375 Hapln proteins act as structural modifiers of the ECM, cross-linking HA to proteoglycans. As  
376 previously discussed, regional ECM crosslinking may change the biomechanical properties of  
377 the ECM by stabilising these components in specific regions of the heart tube. However, both  
378 HA and proteoglycan cleavage products can act as signalling molecules (Iozzo & Schaefer  
379 2015). *Hapln1* mouse mutants exhibit a decrease in protein levels of the proteoglycan Versican  
380 (Wirrig et al. 2007), suggesting that Hapln1-mediated HA-Versican cross-linking is important  
381 for stabilising one or both of these components and preventing regionalised degradation.  
382 Further supporting an interaction between Hapln1a, Versican and HA in heart morphogenesis,  
383 both mice and medaka lacking Versican exhibit severe cardiac malformations (Mjaatvedt et al.  
384 1998; Mittal et al. 2019), while reduction in activity of the protease ADAMTS results in  
385 reduced Versican cleavage and cardiac abnormalities (Kern et al. 2010; Kim et al. 2018). We  
386 have shown that of the two zebrafish versican paralogs, only *vcana* is expressed in a domain  
387 overlapping with *hapln1a* expression (Fig S3). Versican proteins exist in a number of isoforms  
388 and depending on domain structure can be subject to cleavage by ADAMTS proteases  
389 (Nandadasa et al. 2014). Analysis of zebrafish *Vcana* suggests it is a small V3 or V4-like  
390 isoform which are not predicted to undergo cleavage suggesting that in contrast to mouse,  
391 zebrafish Hapln1a may not act to stabilise Versican in the ECM. Alternatively, Hapln1a cross-  
392 linking may facilitate regional degradation of HA in the heart tube, or modulate different  
393 functions of HA, similar to the role of regionalised HA modification in establishing gut  
394 laterality in chick and mouse (Sivakumar et al. 2018). Identification of the HA receptors  
395 involved in HA signalling in the heart would help us understand how Hapln1a may regionally  
396 modulate responses to seemingly ubiquitous HA.



397 Recent studies have shown that cross talk between the myocardium and endocardium  
398 modulates atrial growth (Bornhorst et al. 2019), and differential ECM composition and/or  
399 degradation may help regionally fine tune this process to dictate chamber morphology.  
400 Therefore determining whether the regionalised cardiac ECM plays a structural role or is  
401 required for modulation of extracellular signalling will be an important step in understanding  
402 how these cell layers interact to drive correct chamber morphogenesis.

403 Analysis of *hapln1a* expression in *pkd2* mutant embryos, which have defective KV function  
404 and randomised left-right asymmetry (Schottenfeld et al. 2007) demonstrates that posterior up-  
405 regulation of *hapln1a* in the cardiac disc is not dependent upon KV function. However, we  
406 observe that in *pkd2* mutants where asymmetry of the heart is reversed and the heart tube  
407 extends to the right, due to the cellular movements required for tube formation *hapln1a*-  
408 expressing cells are positioned on the right side of the heart tube instead of the left (Fig. 6). We  
409 propose a model in which while antero-posterior patterning of the heart disc is laterality-  
410 independent, since laterality signals promote cardiac disc rotation and heart tube displacement,  
411 this results in *hapln1a* asymmetry along the left-right axis of the heart tube. This generates  
412 lateral ECM asymmetry in the heart, promoting robust looping and chamber ballooning  
413 morphogenesis (Figure 6N). This would begin to explain previous observations that heart tube  
414 position prior to looping predicts the direction of looping morphogenesis (Baker et al. 2008;  
415 Chen et al. 1997), since the direction of heart tube extension will dictate lateralised ECM  
416 asymmetry in the tube. In addition, we show that in embryos lacking Nodal signalling, *Hapln1a*  
417 is positioned on the ventral face of the heart (Fig 6). Together with our previous observations  
418 that the heart disc of *spaw* mutants undergo a very mild level of rotation and that the direction  
419 of this limited rotation is consistent with the final outcome of looping direction (Noël et al.  
420 2013), it is possible that even slight rotation in the heart disc is sufficient to set up mild  
421 asymmetry in the ECM that can go on to promote directional looping, supporting the

422 hypothesis that these pathways may act together to robustly ensure directional looping  
423 morphogenesis.

424 Together this study elaborates upon our previously proposed model where laterality-based  
425 extrinsic cues feed into a tissue-intrinsic mechanism of heart looping to promote robust  
426 directional cardiac morphogenesis.

427

## 428 **Acknowledgements**

429 The Zeiss Z1 Lightsheet microscope was funded by BHF Infrastructure grant IG/15/1/31328.

430 Additional imaging work was performed at the Wolfson Light Microscopy Facility, using the

431 Airyscan and Nikon A1 microscopes for acquisition and Arivis Vision4D for image processing.

432 EN is supported by British Heart Foundation Intermediate Basic Science Research Fellowship

433 grant number FS/16/37/32347, and an Academy of Medical Science Springboard Award. We

434 thank Kelly Smith for the *ssNcan-GFP* construct, Markus Affolter for the VE-Cadherin

435 antibody, and Aylin Metzner for help with characterising the *pkd2<sup>hu2173</sup>* allele. We also thank

436 Tanya Whitfield, David Strutt and Simon Johnston for their helpful comments on the

437 manuscript.

438

## 439 **Author Contributions**

440 CJD and EN conceived the study and designed the experiments. CJD, JSP, FH, EP and EN

441 carried out experimental work. AS, RW and TC shared the *Tg(fli1a:AcTagRFP)* transgenic

442 line prior to publication, FT and JB generated the *Tg(lft2BAC:Gal4FF)* transgenic line, and

443 FvE characterised the *pkd<sup>hu2173</sup>* allele. JB provided financial support for the Tomo-seq

444 experiments. EN wrote the manuscript with input from CJD, JSP, EP, FT and TC.

445

## 446 **Figure Legends**

447

448 **Figure 1 – The hyaluronan-rich ECM is asymmetric during early heart development**

449 A: Schematic depicting the developmental stage and orientation of embryos used in live  
450 imaging experiments. Optical transverse sections of the heart tube are imaged at the position  
451 of the dotted line/dotted square. Green - myocardium, magenta – endocardium, pink – dorsal  
452 myocardium. VP – venous pole, AP – arterial pole. . B-G: Light sheet optical cross-sections  
453 through the heart tube of a 26hpf *Tg(myl7:lifeActGFP); Tg(fli1a:AC-TagRFP);*  
454 *Tg(lft2BAC:Gal4FF,UAS:RFP)* transgenic embryo during diastole (B-D) and systole (E-G) at  
455 the level of the dotted line in A. The myocardium is marked in green (B, D, E, G), and the  
456 dorsal myocardium and endocardium are marked in magenta (C, D, F, G). The extracellular  
457 space between the myocardium and endocardium is expanded on the left side of the heart tube  
458 (white arrowhead). H: Quantification of left-right ECM ratio in heart tubes, where a value  
459 greater than 1 (red dotted line) denotes left-sided expansion, n=6. I-K: Single confocal z-planes  
460 longitudinally through the heart at 26hpf of embryos injected with *ssNcan-GFP* (green),  
461 counterstained with cardiac troponin (magenta, I, K) and VE-Cadherin (cyan J, K). L-M:  
462 Transverse optical reslice through the 26hpf heart tube at the level of the venous pole (L) or  
463 arterial pole (M), *ssNcan-GFP* in green, cardiac troponin in magenta. ECM width is measured  
464 using the *ssNcan-GFP* signal (yellow line) on left and right sides of the tube. N: Quantification  
465 of ECM width on the left (blue) and right (orange) sides of the heart tube from venous pole to  
466 arterial pole at 26hpf. Mean +/- SD are plotted, n=7. O: left-right ECM ratio in the heart tube  
467 from venous pole to arterial pole, where a value >1 (red dotted line) indicates a left-sided  
468 expansion. Mean +/- SD are plotted. L – left, R – right, VP – venous pole, AP – arterial pole.

469

470 **Figure 2 – *hapln1a* is regionally expressed in the heart tube and secreted asymmetrically**  
471 **into the cardiac jelly**

472 A: Schematic representation of Tomo-seq pipeline. GFP-expressing hearts are manually  
473 excised from embryos at 26hpf, and frozen in OCT tissue freezing medium. Heart tubes are  
474 sectioned along the atrioventricular axis of the heart. RNA is extracted from individual slices,  
475 labelled with a slice-specific molecular barcode during reverse transcription and undergoes  
476 RNA amplification before generating sequencing libraries. B: Example Tomo-seq traces from  
477 a single 26hpf heart tube, with individual slices from venous pole to arterial pole represented  
478 along the x axis and normalised read number plotted on the y axis. Read numbers for atrial  
479 marker *myh6* (green) and ventricular marker *myh7l* (blue) allows identification of chamber  
480 position within the dataset. *hyaluronan and proteoglycan link protein 1a* (*hapln1a*, magenta)  
481 expression is upregulated in atrial sections. C-F: mRNA *in situ* hybridisation analysis of  
482 *hapln1a* expression in the heart between 19hpf and 50hpf. At cardiac disc stage *hapln1a* is  
483 upregulated in the posterior disc (arrow C), and this posterior expression is maintained as the  
484 heart forms the cardiac cone prior to tube formation (arrow D), with lower levels found in the  
485 anterior cone. Once the heart cone has extended to form the tube, the posterior *hapln1a*  
486 expression is positioned on the left side of the tube (bracket, E), and expressed at higher levels  
487 in the atrium than the ventricle. By 50hpf *hapln1a* expression in the heart is restricted to low  
488 levels in the atrioventricular canal (AVC, asterisk, F). Schematics above *in situ* panels indicate  
489 heart morphology at each stage, and *hapln1a* expression domain within the heart. G-I:  
490 Fluorescent *in situ* hybridisation analysis of *hapln1a* (magenta) in *Tg(myf7:lifeActGFP)*  
491 transgenic embryos shows that *hapln1a* is expressed in myocardial cells at 26hpf. J-L:  
492 Fluorescent immunostaining of Hapln1a (magenta) in *Tg(myf7:lifeActGFP)* transgenic  
493 embryos demonstrates that it is secreted into the extracellular space predominantly on the left  
494 side of the heart tube (magenta) at 26hpf. G, J: dorsal views, H-I, K-L: transverse views. M-  
495 Q: Fluorescent immunostaining of Hapln1a (magenta) in *Tg(myf7:lifeActGFP)* transgenic

496 embryos at 50hpf reveals that Hapln1a protein is maintained in the cardiac ECM as looping  
497 progresses. M-O: Ventral views, P-Q: transverse views.

498

### 499 **Figure 3 – Hapln1a promotes atrial growth and heart morphogenesis**

500 A-B: Brightfield images of wild type siblings (A) and *hapln1a*<sup>Δ241</sup> mutants (B) at 72hpf. C-E  
501 *hapln1a*<sup>Δ241</sup> mutants do not exhibit gross morphological defects. C-E: mRNA *in situ*  
502 hybridisation analysis of *hapln1a* expression at 26hpf in embryos from an incross of  
503 *hapln1a*<sup>Δ241</sup> heterozygous carriers. Wild type and heterozygous siblings express *hapln1a* in the  
504 heart (bracket C, D), whereas *hapln1a* is absent in homozygous mutants (arrow E). F-N:  
505 mRNA *in situ* hybridisation expression analysis at 50hpf of *myl7* (F-H), *myh7l* (I-K) and *myh6*  
506 (L-N) in wild type siblings (F, I, L), *hapln1a*<sup>Δ241</sup> heterozygous siblings (G, J, M) or *hapln1a*<sup>Δ241</sup>  
507 homozygous mutant embryos (H, K, N). O-Q: Maximum intensity projections of light sheet z-  
508 stacks of 72hpf *Tg(my17:lifeActGFP); Tg(fli1a:AC-TagRFP)* transgenic wild type (O),  
509 *hapln1a*<sup>Δ241</sup> heterozygous sibling (P) and *hapln1a*<sup>Δ241</sup> mutant embryos (Q). R-U: Quantification  
510 of whole heart size (R) and chamber size of the ventricle (S) or atrium (T) in sibling embryos  
511 and *hapln1a*<sup>Δ241</sup> mutants at 50hpf. Heart size is significantly reduced and atrial size mildly  
512 reduced in *hapln1a*<sup>Δ241</sup> mutants compared to wild type siblings. R-T: Graphs show mean +/-  
513 SD. U: Graph shows median +/- interquartile range. \* = p<0.05, ns = not significant.  
514 Comparative analysis between each group was analysed using a Kruskal-Wallis test with  
515 multiple comparisons.

516

### 517 **Figure 4 – Hapln1a drives regionalised ECM expansion**

518 A: Quantification of ECM left/right width along the longitudinal axis of the heart at 26hpf in  
519 embryos injected with either *tp53* MO (blue, n=5) or *hapln1a* MO + *tp53* MO (orange, n=6).  
520 Mean +/- SD are plotted. B: Average ECM width on the left or right side of the heart tube in

521 embryos injected with *tp53* MO (blue) or *hapln1a* MO + *tp53* MO (orange). *tp53*-injected  
522 controls display a significantly expanded ECM on the left side of the heart tube compared to  
523 the right, whereas embryos injected with *hapln1a* MO + *tp53* MO do not exhibit left-sided  
524 expansion of the ECM. Mean +/- SD are plotted. C-D: Quantification of ECM width on the  
525 left and right sides of the heart tube from venous pole to arterial pole at 26hpf in embryos  
526 injected with *tp53* MO (C) or *hapln1a* MO + *tp53* MO (D). Graphs show mean +/- SD. The  
527 cardiac ECM in *tp53* morphants exhibits atrial and left side expansion, whereas the ECM in  
528 *hapln1a* morphants is more uniform in width from atrium to ventricle and is not expanded on  
529 the left side. Mean +/- SD are plotted, n=6. E-H: Maximum intensity projections of light sheet  
530 z-stacks of 72hpf *Tg(myl7:lifeActGFP); Tg(fli1a:AC-TagRFP)* transgenic wild type (E,G) and  
531 *hapln1a*<sup>Δ241</sup> mutant embryos (F,H). Yellow boxed regions (E,F) are magnified (G,H). Solid  
532 blue line indicates the centreline of the heart. I-J: Orthogonal views through the atrium of wild  
533 type (I) and *hapln1a* mutant (J) as indicated by blue dashed lines in E and F at 90° angle to the  
534 centreline. \*\*\* = p<0.001, ns = not significant. L – left, R – right.

535

### 536 **Figure 5 – Regionalised *hapln1a* expression in the atrium promotes heart morphogenesis**

537 A: Schematic of DNA construct used to overexpress *hapln1a* specifically in cardiomyocytes.  
538 B, C: mRNA *in situ* hybridisation analysis of *myl7* (red) and *hapln1a* (blue) at 55hpf in embryos  
539 injected with a *myl7:hapln1a* overexpression construct. D: Scatter plot depicting looping ratio  
540 as a function of percentage of the heart covered by *hapln1a* expression together with linear  
541 regression of the data (n=194). Spearman's correlation coefficient (r) deviates significantly  
542 from zero demonstrating that increased coverage of *hapln1a* in the myocardium results in  
543 reduced heart looping morphogenesis. E-I: Illustration of quantification approach to analyse  
544 pan-cardiac or chamber-specific *hapln1a* overexpression at 55hpf. Embryos are stained for  
545 *myl7* and *hapln1a* mRNA (E), and images are split into red, blue and green channels. The green

546 channel (F) highlights the *myl7* expression in the heart and is used to manually draw round the  
547 ventricle and atrium. The red channel highlights the *hapln1a* expression (G), and is first  
548 processed to subtract the background, before the chamber ROIs are applied (G). Each chamber  
549 ROI is isolated, the surrounding image cleared, and a threshold is applied to the *hapln1a*  
550 staining within the ROI (H-I). The number of pixels within the chamber ROI is then measured,  
551 alongside the total area of the ROI, quantifying percentage of the chamber expressing *hapln1a*.  
552 J-K: Analysis of looping ratio as a function of the level of *hapln1a* expression in each chamber  
553 of the heart. Embryos are placed into bins depending on how much of the chamber is  
554 overexpressing *hapln1a*, and average looping ratio for each bin is calculated. Overexpression  
555 of *hapln1a* in the ventricle does not affect looping ratio (J), whereas overexpression of *hapln1a*  
556 in the atrium significantly reduces looping morphogenesis (K). \* =  $p < 0.05$ , \*\* =  $p < 0.01$ , \*\*\*\*  
557 =  $p < 0.0001$  ns = not significant.

558

559 **Figure 6 – Posterior up-regulation of *hapln1a* in the cardiac disc is independent of left-**  
560 **right asymmetry**

561 A-C: mRNA *in situ* hybridisation analysis of *hapln1a* expression at 26hpf in an incross of  
562 *pkd2<sup>hu2173</sup>* heterozygous carriers. At 26hpf, hearts that have jogged to the left exhibit left-  
563 elevation of *hapln1a* (A), hearts that remain at the midline have no clear left-right asymmetry  
564 in expression (B), and hearts on the right have right-elevated *hapln1a* (C). D-E: Quantification  
565 of position of *hapln1a* expression in sibling and *pkd2<sup>hu2173</sup>* mutant embryos at 22hpf (D) and  
566 26hpf (E). F-M: Fluorescent immunostaining of Hapln1a (magenta) and cardiac troponin  
567 (green) at 26hpf in wild type siblings (F-I) or *spaw* mutant embryos (J-M). Wild type siblings  
568 exhibit left-sided deposition of Hapln1a in the heart tube (F-I, n=6), whereas *spaw* mutant  
569 embryos exhibit ventral localisation of Hapln1a (J-M, n=6). F, J: dorsal views, G-I, K-M;  
570 optical transverse sections. L - left, R - right, D - dorsal, V - ventral. N: Model depicting the

571 interplay between laterality dependent and independent pathways that promote heart looping  
572 morphogenesis.

573

## 574 **Materials and Methods**

### 575 *Zebrafish maintenance*

576 Adult zebrafish were maintained according to standard laboratory conditions. The following  
577 lines were used: AB, *Tg(myl7:eGFP)* (Huang et al. 2003), *Tg(myl7:lifeActGFP)* (Reischauer  
578 et al. 2014), *Tg(fli1a:AC-TagRFP)<sup>sh511</sup>* (Savage et al. 2019), *spaw<sup>t30973</sup>* (Noël et al. 2013),  
579 *Tg(lft2BAC:Gal4FF)*; *Tg(UAS;RFP)*, *pkd2<sup>hu2173</sup>*, *hapln1a<sup>promΔ241</sup>* (allele designation  
580 *hapln1a<sup>sh580</sup>*), *hapln1a<sup>promΔ187</sup>* (allele designation *hapln1a<sup>sh578</sup>*). Embryos older than 24hpf were  
581 treated with 0.2 mM 1-phenyl-2-thiourea (PTU) in E3 medium to inhibit melanin production.

582

### 583 *Generation of hapln1a mutants*

584 To generate *hapln1a* mutant zebrafish lines, CRISPR guide RNAs (gRNA) were designed to  
585 target the putative promoter region of *hapln1a* (GRCz11: ENSDART00000122966.4, g1: 5'-  
586 TCGTCTCTCTCTAAGGGGAGGGG-3') and the downstream region of the translation start  
587 site (g2: 5'-GATGATTGCTCTGTTTTCTGTGG-3'). Sequence-specific CRISPR RNAs  
588 (crRNA) were synthesised by Merck, resuspended in MilliQ water to 21.4μM, and injected  
589 together with an equimolar concentration of trans-activating RNA (tracrRNA, Merck) and  
590 Cas9 protein (NEB M0386T) into the yolk of 1-cell stage embryos in a volume of 1nl. CRISPR-  
591 Cas9-injected embryos were raised to adulthood (F0) and individuals transmitting putative  
592 promoter deletions in the germline were identified by outcrossing to wildtype. Embryos  
593 collected from these outcrosses were genotyped by PCR using the following primers to amplify  
594 the putative promoter region of *hapln1a*: forward 5'-ACATTTTGCATGCCCTCGAA-3';  
595 reverse 5'-TGCATCCTGGACCTTCATTCA-3'. Successful promoter deletion was identified



596 by presence of a smaller PCR fragment and subsequent Sanger sequencing of the promoter  
597 region to confirm the deletion. F0 founders transmitting a desirable mutation were outcrossed,  
598 offspring raised to adulthood, and heterozygous F1 adults identified by genotyping using the  
599 above primers. Two separate *hapln1a* promoter deletion alleles were recovered:  
600 *hapln1a<sup>promΔ187</sup>* and *hapln1a<sup>promΔ241</sup>*.

601

#### 602 *Generation of the Tg(lft2BAC:Gal4FF) transgenic line*

603 The *Tg(lft2BAC:Gal4FF)* line was generated by recombineering of bacterial artificial  
604 chromosome (BAC) CH211-236P5 as previously described (Busmann & Schulte-Merker  
605 2011; Tessadori et al. 2012). A Gal4FF<sub>kan</sub> cassette was inserted at the ATG start codon of  
606 the first exon of the *lft2* gene. Amplification from a pCS2+Gal4FF<sub>kanR</sub> plasmid was achieved  
607 with primers :

608 F\_LFT2\_GAL4FF

609 5'-

610 cctcagagcttcagtcagtcattcattcttctcactggcatcgttagatcaACCATGAAGCTACTGTCTTCTATCGA

611 AC-3'

612 R\_LFT2\_NEO

613 5'-

614 tgtgtgagtgagatcgctgtggcaaaatgaacagctggatgaacagagcTCAGAAGAACTCGTCAAGAAGGC

615 G-3'

616 Sequences homologous to the genomic locus in lower case. Recombineering was essentially  
617 carried out following the manufacturer's protocol (Red/ET recombination; Gene Bridges  
618 GmbH). BAC DNA isolation was carried out using a Midiprep kit (Life Technologies BV).  
619 BAC DNA was injected at a concentration of 300 ng/μl in the presence of 0.75U PI-SceI  
620 meganuclease (New England Biolabs) in 1-cell stage *Tg(UAS:GFP)* or *Tg(UAS:RFP)* embryos

621 (both UAS lines(Asakawa & Kawakami 2008)). At 1dpf, healthy embryos displaying robust  
622 *lft2*-specific fluorescence were selected and grown to adulthood. Founder fish (F0) were  
623 identified by outcrossing and the progeny (F1) was grown to establish the transgenic line.

624

#### 625 *Generation of $pkd2^{hu2173}$ allele*

626 The *pkd2<sup>hu2173</sup>* allele was generated using ENU mutagenesis and consists of an A->T  
627 transversion at base position 1327 which results in a premature stop codon at amino acid 302  
628 of 904. The truncation occurs in the first extracellular loop, before the channel pore, and is  
629 predicted to be a null. The *pkd2<sup>hu273</sup>* allele can be identified by PCR amplification with the  
630 following primers: forward primer 5'- GATTTATTGCTCTGTTTGTGTAAGGA-3' and  
631 reverse primer 5' -GAAGTCCAAGAACACCGCTC-3', followed by XmnI restriction of the  
632 PCR product. The primers contain a mismatch which together with the *pkd2<sup>hu2173</sup>* mutation  
633 introduces an XmnI recognition site into the mutant strand.

634

#### 635 *mRNA in situ hybridisation*

636 Embryos were fixed overnight in 4% PFA, and mRNA *in situ* hybridisations were carried out  
637 as previously described (Noël et al. 2013). Fluorescent *in situ* hybridisations were performed  
638 using the TSA kit (Perkin-Elmer) (Welten et al. 2006). The *hapln1a* mRNA probe construct  
639 was generated by amplifying an 860bp fragment of the *hapln1a* CDS using the primers F: 5'-  
640 TGGCATTGATGGTGTGTTGCA-3'; R: 5'-ACAGTTCCGTCCTAAGCCA-3'. The *has2*  
641 mRNA probe construct was generated by amplifying an 1050bp fragment of the CDS using  
642 the primers F: 5'-GTTACACGCAGACCTCATCAC-3'; R: 5'-  
643 CATCCAATACCTCACGCTGC-3'. The *acana* mRNA probe construct was generated by  
644 amplifying an 1067bp fragment of the CDS using the primers F: 5'-  
645 CGGATCAAGTGGAGTCTGGT -3'; R: 5'- GAAGGGAGGACGTGGGAAAT -3'. The

646 *acarb* mRNA probe construct was generated by amplifying an 1035bp fragment of the CDS  
647 using the primers F: 5'- ATCAAGACAGCACCCCTCAGT -3'; R: 5'-  
648 TTTCTGGAAATGGCGTGGTC -3'. The *chyl* mRNA probe construct was generated by  
649 amplifying an 801bp fragment of the CDS using the primers F: 5'-  
650 CACCATTCAGCTCCATCGTG-3'; R: 5'- TCGGCTTTGGGGTACTTCAT-3'. All probe  
651 sequences were ligated into the PCR2-TOPO vector (Invitrogen). *vcana* and *vcarb* mRNA  
652 probes have been previously described (Kang et al. 2004). Riboprobes were transcribed from  
653 linearized template in the presence of DIG-11-UTP or Fluorescein-11-UTP (Roche).

654

### 655 *Immunohistochemistry*

656 Whole mount immunohistochemistry was carried out as previously described (de Pater et al.  
657 2009). The following commercially available primary antibodies were used:  $\alpha$ GFP (1:1000  
658 Aves lab),  $\alpha$ CT3 (1:100, Developmental Studies Hybridoma Bank),  $\alpha$ Cdh5 (Blum et al. 2008)  
659 (1:100). A rabbit polyclonal antibody targeting amino acids 117-134  
660 (DGMNDMTLEVDLEVQGKD) of zebrafish Hapln1a was designed and produced by  
661 Proteintech. Test bleeds were used to determine cross-reactivity with Hapln1a by comparing  
662 protein localisation at 26hpf with mRNA *in situ* hybridization. Subsequently, affinity-purified  
663 Hapln1a antibody was used 1:100. Fluorophore-conjugated secondary antibodies were  
664 obtained from Jackson labs and used at 1:200.

665

### 666 *Tomo-seq*

667 Hearts were dissected from *Tg(myh7:eGFP)* zebrafish embryos at 26hpf and placed into O.C.T  
668 cryofreezing medium (Sakura Finetek). Blue Affy-gel beads (BioRad) were placed at each end  
669 of the heart tube to aid visualisation during sectioning, and the hearts were rapidly frozen in  
670 OCT blocks and stored at -80°C. Hearts were sectioned using a cryostat at 9 $\mu$ m resolution.

671 RNA extraction, aRNA synthesis, library preparation, sequencing and data analysis was  
672 performed as previously described (Burkhard & Bakkers 2018; Junker et al. 2014).

673

#### 674 *Morpholino-mediated knockdown and hapln1a overexpression analysis*

675 The following morpholino was designed to target the translational start site of *hapln1a*  
676 (AGAGCAAT[CAT]CTTCACGTTTGTTA). Morpholinos blocking *tp53* (Robu et al. 2007;  
677 Langheinrich et al. 2002), *Zfin tp53* MO-4) and *has2* (Bakkers et al. 2004), *has2* MO-1) are  
678 previously described. All morpholinos were supplied by GeneTools and diluted to a stock of  
679 1mM. Working concentrations were as follows: *hapln1a* 500nM or 250nM, *has2* 250nM,  
680 combinatorial *has2/hapln1a* 250nM each, *tp53* 250nM. All *has2* and *hapln1a* morpholinos  
681 were co-injected together with the *tp53* morpholino. Embryos were injected with 1nl of  
682 working morpholino solution.

683 Full length *hapln1a* coding sequence was amplified using the following primers containing  
684 AttB sequences for subsequent Gateway cloning, as well as a Kozak sequence (underlined): F:  
685 5'ggggacaagtttgtaaaaaagcaggctTCGCCGCCACCATGATTGCTCTGTTTTCTGT 3'; R:  
686 5'GGGGACCACTTTGTACAAGAAAGCTGGGTTTTACTGCTGGGCTTTGTAGCAATA  
687 3'. The resulting PCR product was ligated into the pDONR221 middle entry Gateway vector,  
688 and sequenced to verify integrity of the insertion, generating a pME*hapln1a*CDS vector. Full  
689 length *hapln1a* was subsequently recombined with a p5E *myl7* promoter sequence, and a p3E  
690 polyA sequence into the pDestTol2pA3 destination vector to generate the final  
691 pDest*myl7:hapln1a* overexpression construct. All Gateway cloning was carried using the Tol2  
692 kit via standard protocols (Kwan et al. 2007). 60pg of pDest*myl7:hapln1a* was co-injected  
693 with 25pg of *tol2* mRNA into the cell of 1-cell stage embryos. Analysis of *hapln1a*  
694 overexpression and cardiac morphogenesis was carried out using double *in situ* hybridisation  
695 to assess *hapln1a* and *myl7* expression.

696

697 *RNA injections*

698 *ssNcan-GFP* mRNA was synthesised from the *ssNcan-GFP* construct as previously described  
699 (De Angelis et al. 2017). Embryos were injected with 100pg of mRNA in 1nl volume at the 1-  
700 cell stage and screened for GFP at 24hpf.

701

702 *Pharmacological treatments*

703 To block HA synthesis, 4-Methylumbelliferone (4-MU, Sigma-Aldrich) was dissolved in  
704 DMSO to a stock concentration of 100mM, and subsequently diluted to a working  
705 concentration of 1mM in E3 medium. Embryos were dechorionated and incubated in 4-MU or  
706 an equal concentration of DMSO (1%). For timed treatments, at the end of the treatment  
707 window embryos were washed 3 x 5 mins in E3 to remove the 4MU, before being placed in  
708 fresh E3 until fixation.

709

710 *Imaging and image quantification*

711 Live zebrafish embryos were imaged on a ZEISS Lightsheet Z.1 microscope at 72hpf. To  
712 assess cardiac morphology at 72hpf embryos were anaesthetised with tricaine before mounting  
713 in 1% low melting point agarose in E3 with 8.4% tricaine, using black capillaries. To stop the  
714 heart the imaging chamber was filled with E3 plus tricaine (8.4%) and the temperature  
715 maintained at 10°C. All samples were imaged using a 20X lens and 1.0 zoom. Dual side lasers  
716 with dual side fusion and pivot scan were used for sample illumination. Image stacks were  
717 initially processed using Vision4D (Arivis AG, Germany) and Fiji. Processing steps included  
718 noise removal, background correction, and subsequent application of individual morphological  
719 filters to each channel to sharpen the edges of the myocardial and endocardial tissue layers.  
720 Maximum intensity z-projections of the composite channels were used to visualise cardiac

721 morphology the centreline of the heart was manually traced. Optical transverse sections  
722 perpendicular to the centreline were generated at regularly-spaced intervals originating from  
723 the venous pole into the atrium to visualise the cardiac ECM.

724 Embryos injected with *ssNcan-GFP* mRNA were fixed overnight in 4% PFA, and  
725 immunohistochemistry was carried out to amplify the GFP signal. Embryos were dissected  
726 and imaged using a Zeiss Airyscan microscope, and z stacks were obtained with a z-step size  
727 of 1 $\mu$ M. Images were Airyscan processed using Zen Black software (Zeiss), and the resulting  
728 image stacks were optically resliced using Fiji. ECM width was manually measured in Fiji.  
729 ECM measurements were aligned between samples at the venous pole of the heart for plotting.

730 Looping ratio was calculated from images of *myl7* expression detected by ISH. All samples  
731 from one experimental set were blinded using the ImageJ Blind\_Analysis plugin  
732 ([https://github.com/quantixed/imagej-macros/blob/master/Blind\\_Analysis.ijm](https://github.com/quantixed/imagej-macros/blob/master/Blind_Analysis.ijm)). The linear  
733 distance from arterial to venous poles of the heart was measured as a straight-line distance, and  
734 looped distance was drawn from the same positions at each pole through the centre of each  
735 chamber, down the centreline of the looped heart. Looping ratio was determined by dividing  
736 looped distance by linear distance. Statistical testing of average looping ratio between  
737 experimental conditions was carried out using Kruskal-Wallis with Dunn's multiple  
738 comparisons.

739 Heart, ventricle or atrium area at 50hpf was quantified from *in situ* hybridisations by manually  
740 drawing round either *myl7*, *myh7l* or *myh6* staining area in Fiji. Statistical testing of heart or  
741 chamber size between genotypes was carried out using Kruskal-Wallis with Dunn's multiple  
742 comparisons.

743 Quantification of *hapln1a* overexpression was performed by imaging overexpression embryos  
744 where *myl7* expression was detected using INT/BCIP and *hapln1a* expression detected using  
745 NBT/BCIP. All embryos were imaged using the same microscope settings, and individual

746 images combined into a composite of all experiments. Using the composite, channels were  
747 split in Fiji, resulting in the blue and green channels carrying the *myl7* stain, and the red channel  
748 carrying the *hapln1a* stain. Background was subtracted in the red channel. The *myl7* staining  
749 was used to calculate looping ratio for each heart. In addition, each *myl7* signal was used to  
750 manually trace the whole heart, atrium, AVC and ventricle for each heart, which was saved as  
751 a region of interest (ROI) and the area of each chamber was measured in pixels. Next, the  
752 *hapln1a* image was thresholded to generate a binary image. The whole-heart, or chamber-  
753 specific ROI was applied to the thresholded *hapln1a* channel, and the number of positive pixels  
754 in each ROI recorded. Number of positive pixels are as a % of total number of pixels  
755 comprising the heart or the specific chamber could then be calculated and plotted against  
756 looping ratio for each heart. Spearmann's correlation coefficient (r) was calculated in  
757 GraphPad Prism, with 95% confidence intervals.

758

## 759 **References**

- 760 Asakawa, K. & Kawakami, K., 2008. Targeted gene expression by the Gal4-UAS system in  
761 zebrafish. *Development, Growth & Differentiation*, 50(6), pp.391–399.
- 762 Baker, K., Holtzman, N.G. & Burdine, R.D., 2008. Direct and indirect roles for Nodal  
763 signaling in two axis conversions during asymmetric morphogenesis of the zebrafish  
764 heart. *Proceedings of the National Academy of Sciences of the United States of America*,  
765 105(37), pp.13924–13929.
- 766 Bakkers, J. et al., 2004. Has2 is required upstream of Rac1 to govern dorsal migration of  
767 lateral cells during zebrafish gastrulation. *Development*, 131(3), pp.525–537.
- 768 Bhana, B. et al., 2010. Influence of substrate stiffness on the phenotype of heart cells.  
769 *Biotechnology and Bioengineering*, 105(6), pp.1148–1160.
- 770 Blum, Y. et al., 2008. Complex cell rearrangements during intersegmental vessel sprouting  
771 and vessel fusion in the zebrafish embryo. *Developmental Biology*, 316(2), pp.312–322.
- 772 Bornhorst, D. et al., 2019. Biomechanical signaling within the developing zebrafish heart  
773 attunes endocardial growth to myocardial chamber dimensions. *Nature Communications*,  
774 10(1), p.4113.
- 775 Brennan, J., Norris, D.P. & Robertson, E.J., 2002. Nodal activity in the node governs left-  
776 right asymmetry. *Genes & Development*, 16(18), pp.2339–2344.

- 777 Burkhard, S.B. & Bakkers, J., 2018. Spatially resolved RNA-sequencing of the embryonic  
778 heart identifies a role for Wnt/ $\beta$ -catenin signaling in autonomic control of heart rate.  
779 *eLife*, 7, p.971.
- 780 Bussmann, J. & Schulte-Merker, S., 2011. Rapid BAC selection for tol2-mediated  
781 transgenesis in zebrafish. *Development*, 138(19), pp.4327–4332.
- 782 Camenisch, T.D. et al., 2000. Disruption of hyaluronan synthase-2 abrogates normal cardiac  
783 morphogenesis and hyaluronan-mediated transformation of epithelium to mesenchyme.  
784 *Journal of Clinical Investigation*, 106(3), pp.349–360.
- 785 Chen, J.N. et al., 1997. Left-right pattern of cardiac BMP4 may drive asymmetry of the heart  
786 in zebrafish. *Development*, 124(21), pp.4373–4382.
- 787 Chen, Q. et al., 2007. Potential role for heparan sulfate proteoglycans in regulation of  
788 transforming growth factor-beta (TGF-beta) by modulating assembly of latent TGF-beta-  
789 binding protein-1. *Journal of Biological Chemistry*, 282(36), pp.26418–26430.
- 790 Chowdhury, B. et al., 2017. Hyaluronidase 2 Deficiency Causes Increased Mesenchymal  
791 Cells, Congenital Heart Defects, and Heart Failure. *Circulation: Cardiovascular*  
792 *Genetics*, 10(1), p.135.
- 793 Daley, W.P. & Yamada, K.M., 2013. ECM-modulated cellular dynamics as a driving force  
794 for tissue morphogenesis. *Current Opinion in Genetics & Development*, 23(4), pp.408–  
795 414.
- 796 De Angelis, J.E. et al., 2017. Tmem2 Regulates Embryonic Vegf Signaling by Controlling  
797 Hyaluronic Acid Turnover. *Developmental Cell*, 40(2), pp.123–136.
- 798 de Pater, E. et al., 2009. Distinct phases of cardiomyocyte differentiation regulate growth of  
799 the zebrafish heart. *Development*, 136(10), pp.1633–1641.
- 800 Desgrange, A., Le Garrec, J.-F. & Meilhac, S.M., 2018. Left-right asymmetry in heart  
801 development and disease: forming the right loop. *Development*, 145(22), pp.dev162776–  
802 19.
- 803 Essner, J.J., 2005. Kupffer's vesicle is a ciliated organ of asymmetry in the zebrafish embryo  
804 that initiates left-right development of the brain, heart and gut. *Development*, 132(6),  
805 pp.1247–1260.
- 806 Grassini, D.R. et al., 2018. Nppa and Nppb act redundantly during zebrafish cardiac  
807 development to confine AVC marker expression and reduce cardiac jelly volume.  
808 *Development*, 145(12), pp.160739–30.
- 809 Guerra, A. et al., 2018. Distinct myocardial lineages break atrial symmetry during  
810 cardiogenesis in zebrafish. *eLife*, 7, p.1734.
- 811 Hannezo, E. & Heisenberg, C.-P., 2019. Mechanochemical Feedback Loops in Development  
812 and Disease. *Cell*, 178(1), pp.12–25.
- 813 Hoffman, J.I.E. & Kaplan, S., 2002. The incidence of congenital heart disease. *JAC*, 39(12),  
814 pp.1890–1900.



- 815 Huang, C.-J. et al., 2003. Germ-line transmission of a myocardium-specific GFP transgene  
816 reveals critical regulatory elements in the cardiac myosin light chain 2 promoter of  
817 zebrafish. *Developmental Dynamics*, 228(1), pp.30–40.
- 818 Ingber, D.E., 2002. Mechanical signaling and the cellular response to extracellular matrix in  
819 angiogenesis and cardiovascular physiology. *Circulation Research*, 91(10), pp.877–887.
- 820 Iozzo, R.V. & Schaefer, L., 2015. Proteoglycan form and function: A comprehensive  
821 nomenclature of proteoglycans. *Matrix biology*, 42, pp.11–55.
- 822 Jansen, K.A., Atherton, P. & Ballestrem, C., 2017. Mechanotransduction at the cell-matrix  
823 interface. *Seminars in Cell & Developmental Biology*, 71, pp.75–83.
- 824 Junker, J.P. et al., 2014. Genome-wide RNA Tomography in the Zebrafish Embryo. *Cell*,  
825 159(3), pp.662–675.
- 826 Kern, C.B. et al., 2010. Reduced versican cleavage due to Adamts9 haploinsufficiency is  
827 associated with cardiac and aortic anomalies. *Matrix biology*, 29(4), pp.304–316.
- 828 Kim, K.H. et al., 2018. Myocardial Angiopoietin-1 Controls Atrial Chamber Morphogenesis  
829 by Spatiotemporal Degradation of Cardiac Jelly. *Cell Reports*, 23(8), pp.2455–2466.
- 830 Kwan, K.M. et al., 2007. The Tol2kit: A multisite gateway-based construction kit for Tol2  
831 transposon transgenesis constructs. *Developmental Dynamics*, 236(11), pp.3088–3099.
- 832 Lagendijk, A.K. et al., 2011. MicroRNA-23 Restricts Cardiac Valve Formation by Inhibiting  
833 Has2 and Extracellular Hyaluronic Acid Production. *Circulation Research*, 109(6),  
834 pp.649–657.
- 835 Levin, M. et al., 1995. A molecular pathway determining left-right asymmetry in chick  
836 embryogenesis. *Cell*, 82(5), pp.803–814.
- 837 Long, K.R. et al., 2018. Extracellular Matrix Components HAPLN1, Lumican, and Collagen  
838 I Cause Hyaluronic Acid-Dependent Folding of the Developing Human Neocortex.  
839 *Neuron*, 99(4), pp.702–719.
- 840 Long, S., 2003. The zebrafish nodal-related gene southpaw is required for visceral and  
841 diencephalic left-right asymmetry. *Development*, 130(11), pp.2303–2316.
- 842 Lowe, L.A. et al., 1996. Conserved left-right asymmetry of nodal expression and alterations  
843 in murine situs inversus. *Nature*, 381(6578), pp.158–161.
- 844 Majkut, S. et al., 2013. Heart-specific stiffening in early embryos parallels matrix and myosin  
845 expression to optimize beating. *Current Biology*, 23(23), pp.2434–2439.
- 846 Mittal, A. et al., 2010. Fibronectin and integrin alpha 5 play essential roles in the  
847 development of the cardiac neural crest. *Mechanisms of Development*, 127(9-12),  
848 pp.472–484.
- 849 Mittal, N., Yoon, S.H., Enomoto, H., Hiroshi, M., Shimizu, A., Kawakami, A., Fujita, M.,  
850 Watanabe, H., Fukuda, K. & Makino, S., 2019. Versican is crucial for the initiation of

- 851 cardiovascular lumen development in medaka (*Oryzias latipes*). *Scientific Reports*, 9(1),  
852 p.9475.
- 853 Mjaatvedt, C.H. et al., 1998. The *Cspg2* gene, disrupted in the *hdf* mutant, is required for  
854 right cardiac chamber and endocardial cushion formation. *Developmental Biology*,  
855 202(1), pp.56–66.
- 856 Müller, P. & Schier, A.F., 2011. Extracellular movement of signaling molecules.  
857 *Developmental Cell*, 21(1), pp.145–158.
- 858 Nakamura, T. et al., 1997. Effect of 4-methylumbelliferone on cell-free synthesis of  
859 hyaluronic acid. *Biochemistry and Molecular Biology International*, 43(2), pp.263–268.
- 860 Nandadasa, S., Foulcer, S. & Apte, S.S., 2014. The multiple, complex roles of versican and  
861 its proteolytic turnover by ADAMTS proteases during embryogenesis. *Matrix Biology*,  
862 35, pp.34–41.
- 863 Noël, E.S. et al., 2013. A Nodal-independent and tissue-intrinsic mechanism controls heart-  
864 looping chirality. *Nature Communications*, 4(1), p.2754.
- 865 Ohkawara, B. et al., 2002. Action range of BMP is defined by its N-terminal basic amino acid  
866 core. *Current Biology*, 12(3), pp.205–209.
- 867 Ouyang, X. et al., 2017. Hyaluronic acid synthesis is required for zebrafish tail fin  
868 regeneration. S. C. F. Neuhaus. *PLoS One*, 12(2), pp.e0171898–22.
- 869 Patra, C. et al., 2011. Nephronectin regulates atrioventricular canal differentiation via *Bmp4*-  
870 *Has2* signaling in zebrafish. *Development*, 138(20), pp.4499–4509.
- 871 Peal, D.S. et al., 2009. Chondroitin sulfate expression is required for cardiac atrioventricular  
872 canal formation. *Developmental Dynamics*, 238(12), pp.3103–3110.
- 873 Rambeau, P. et al., 2017. Reduced aggrecan expression affects cardiac outflow tract  
874 development in zebrafish and is associated with bicuspid aortic valve disease in humans.  
875 *International Journal of Cardiology*, 249(C), pp.340–343.
- 876 Reischauer, S. et al., 2014. Actin binding GFP allows 4D in vivo imaging of myofilament  
877 dynamics in the zebrafish heart and the identification of *ErbB2* signaling as a remodeling  
878 factor of myofibril architecture. *Circulation Research*, 115(10), pp.845–856.
- 879 Rotstein, B. et al., 2018. Distinct domains in the matricellular protein Lonely heart are crucial  
880 for cardiac extracellular matrix formation and heart function in *Drosophila*. *Journal of*  
881 *Biological Chemistry*, 293(20), pp.7864–7879.
- 882 Roxo-Rosa, M. et al., 2015. The zebrafish Kupffer's vesicle as a model system for the  
883 molecular mechanisms by which the lack of *Polycystin-2* leads to stimulation of *CFTR*.  
884 *Biology Open*, 4(11), pp.1356–1366.
- 885 Rozario, T. & DeSimone, D.W., 2010. The extracellular matrix in development and  
886 morphogenesis: A dynamic view. *Developmental Biology*, 341(1), pp.126–140.

- 887 Savage, A.M. et al., 2019. *tmem33* is essential for VEGF-mediated endothelial calcium  
888 oscillations and angiogenesis. *Nature Communications*, 10(1), pp.1–15.
- 889 Schottenfeld, J., Sullivan-Brown, J. & Burdine, R.D., 2007. Zebrafish curly up encodes a  
890 *Pkd2* ortholog that restricts left-side-specific expression of southpaw. *Development*,  
891 134(8), pp.1605–1615.
- 892 Sivakumar, A. et al., 2018. Midgut Laterality Is Driven by Hyaluronan on the Right.  
893 *Developmental Cell*, 46(5), pp.533–551.e5.
- 894 Smith, K.A. et al., 2008. Rotation and Asymmetric Development of the Zebrafish Heart  
895 Requires Directed Migration of Cardiac Progenitor Cells. *Developmental Cell*, 14(2),  
896 pp.287–297.
- 897 Spicer, A.P., Joo, A. & Bowling, R.A., Jr., 2003. A Hyaluronan Binding Link Protein Gene  
898 Family Whose Members Are Physically Linked Adjacent to Chondroitin Sulfate  
899 Proteoglycan Core Protein Genes. *Journal of Biological Chemistry*, 278(23), pp.21083–  
900 21091.
- 901 Strate, I., Tessadori, F. & Bakkers, J., 2015. Glypican4 promotes cardiac specification and  
902 differentiation by attenuating canonical Wnt and Bmp signaling. *Development*, 142(10),  
903 pp.1767–1776.
- 904 Tao, G. et al., 2012. Collagen XIV is important for growth and structural integrity of the  
905 myocardium. *Journal of Molecular and Cellular Cardiology*, 53(5), pp.626–638.
- 906 Tessadori, F. et al., 2012. Identification and Functional Characterization of Cardiac  
907 Pacemaker Cells in Zebrafish A. Barbuti, ed. *PLoS ONE*, 7(10), pp.e47644–9.
- 908 Toyozumi, R. et al., 2005. *Xenopus nodal related-1* is indispensable only for left-right axis  
909 determination. *The International Journal of Developmental Biology*, 49(8), pp.923–938.
- 910 Trinh, L.A. & Stainier, D.Y.R., 2004. Fibronectin regulates epithelial organization during  
911 myocardial migration in zebrafish. *Developmental Cell*, 6(3), pp.371–382.
- 912 Tsuda, T., Majumder, K. & Linask, K.K., 1998. Differential expression of *flectin* in the  
913 extracellular matrix and left-right asymmetry in mouse embryonic heart during looping  
914 stages. *Developmental Genetics*, 23(3), pp.203–214.
- 915 van der Linde, D. et al., 2011. Birth Prevalence of Congenital Heart Disease Worldwide.  
916 *JAC*, 58(21), pp.2241–2247.
- 917 Wan, W. et al., 2019. Cardiac myocytes respond differentially and synergistically to matrix  
918 stiffness and topography. *BioRxiv*, 52(51), pp.13803–29.
- 919 Wells, R.G., 2008. The role of matrix stiffness in regulating cell behavior. *Hepatology*, 47(4),  
920 pp.1394–1400.
- 921 Welten, M.C.M. et al., 2006. ZebraFISH: Fluorescent In Situ Hybridization Protocol and  
922 Three-Dimensional Imaging of Gene Expression Patterns. *Zebrafish*, 3(4), pp.465–476.

923 Wirrig, E.E. et al., 2007. Cartilage link protein 1 (Crtl1), an extracellular matrix component  
924 playing an important role in heart development. *Developmental Biology*, 310(2), pp.291–  
925 303.

Figure 1 - The hyaluronan-rich ECM is asymmetric during early heart development

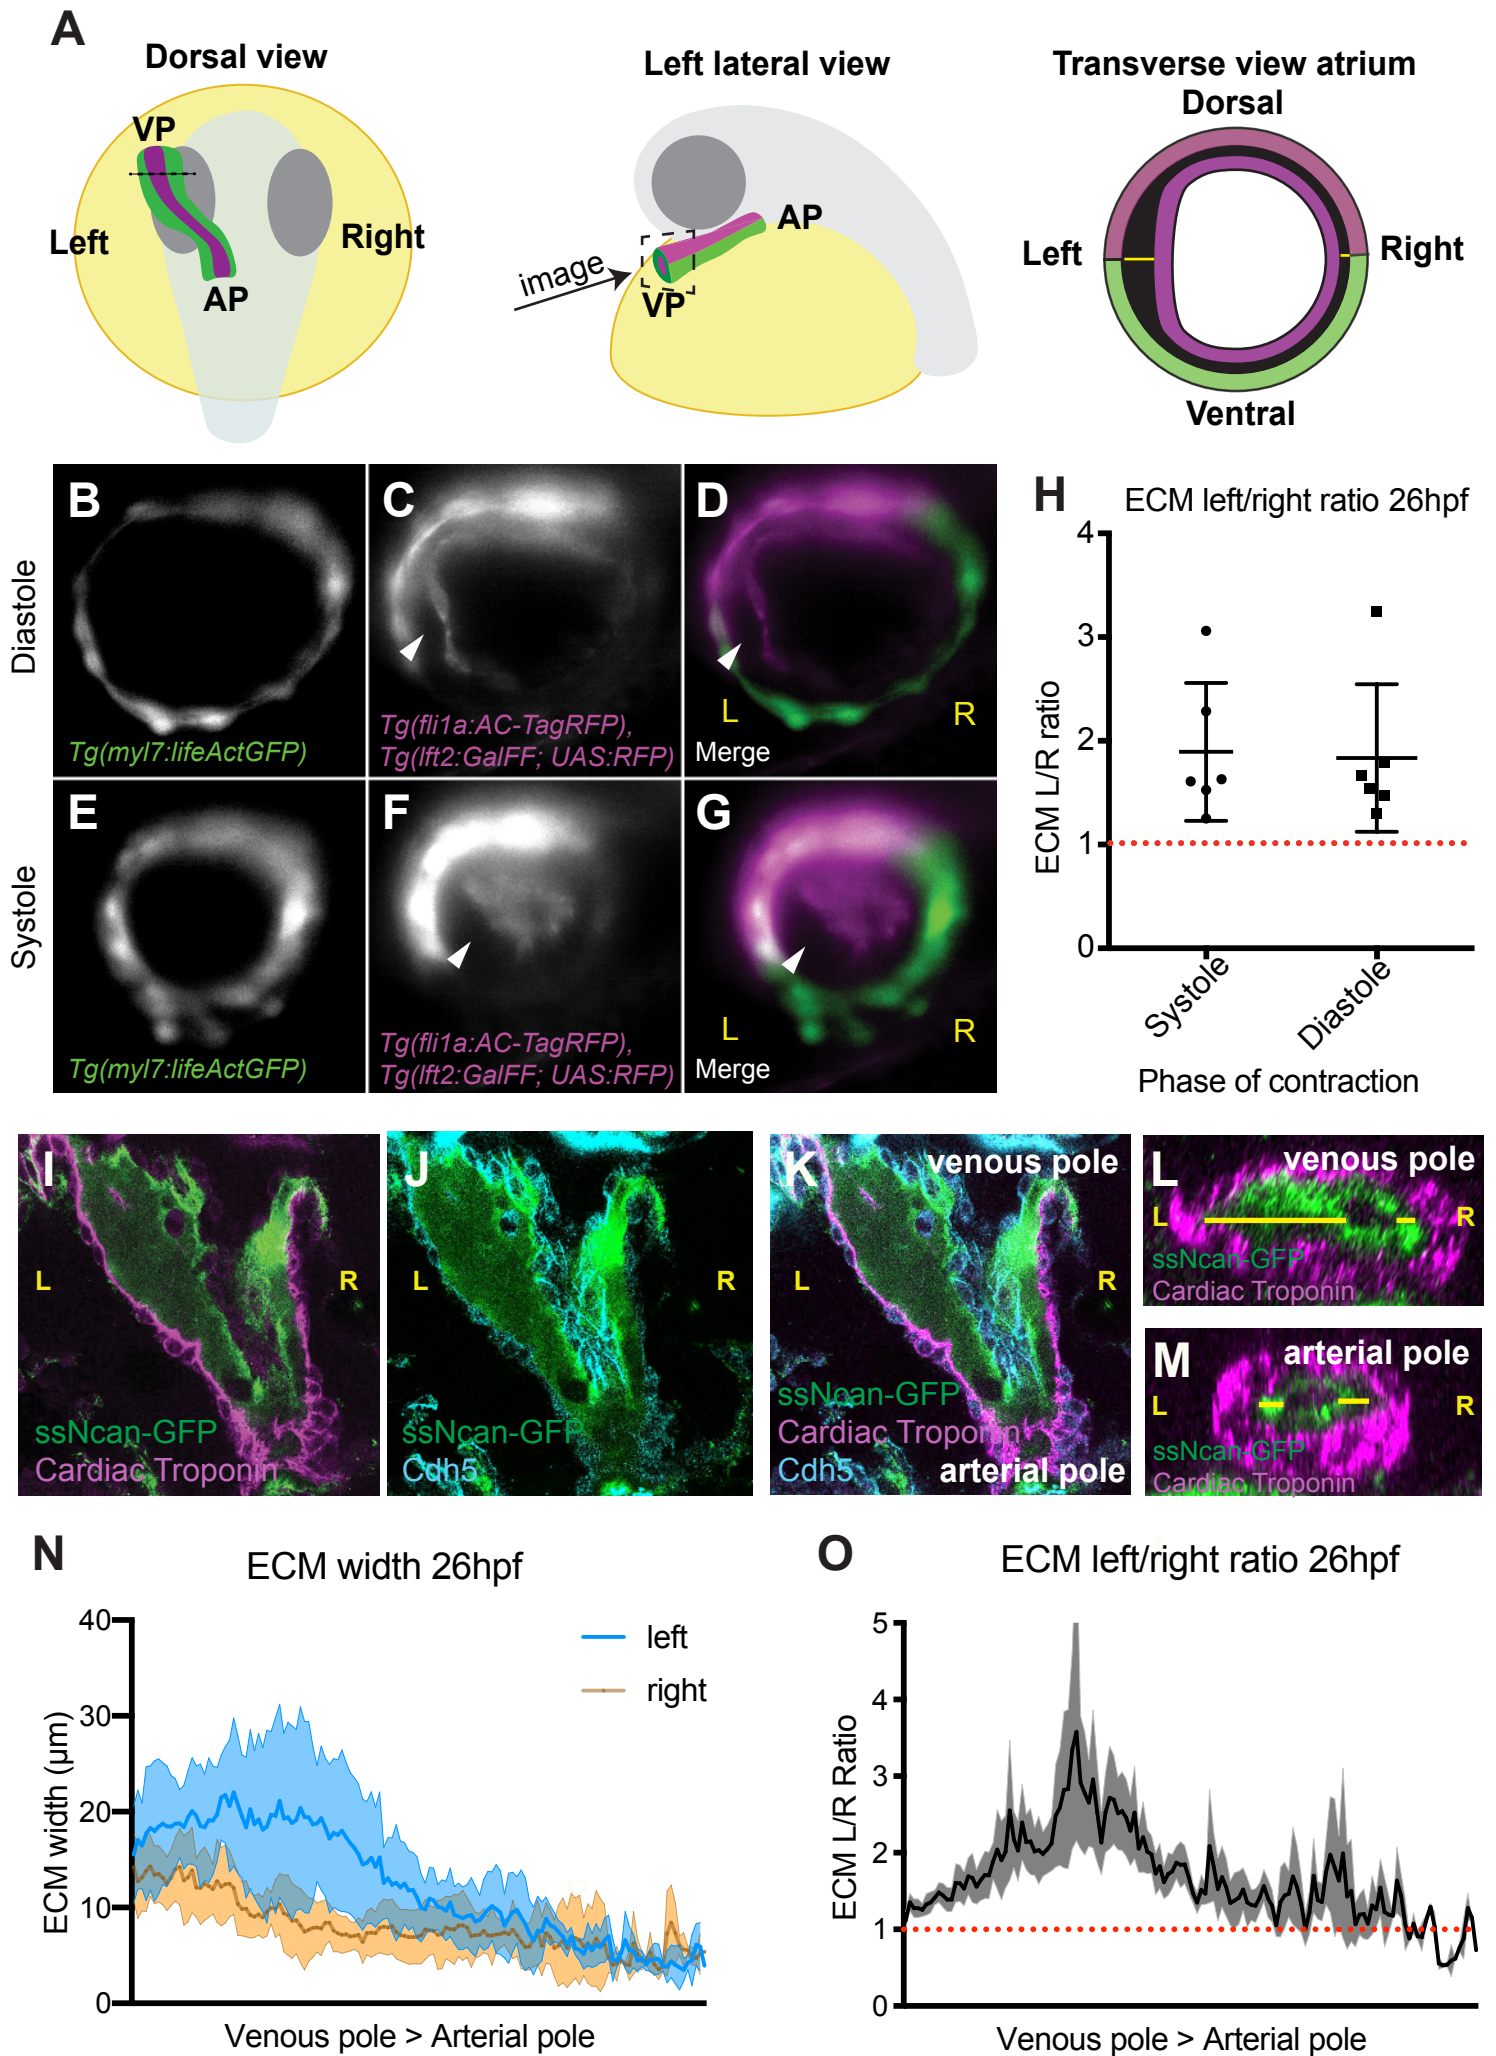

## Figure 2- *hapln1a* is regionally expressed in the heart tube and secreted asymmetrically in the cardiac jelly

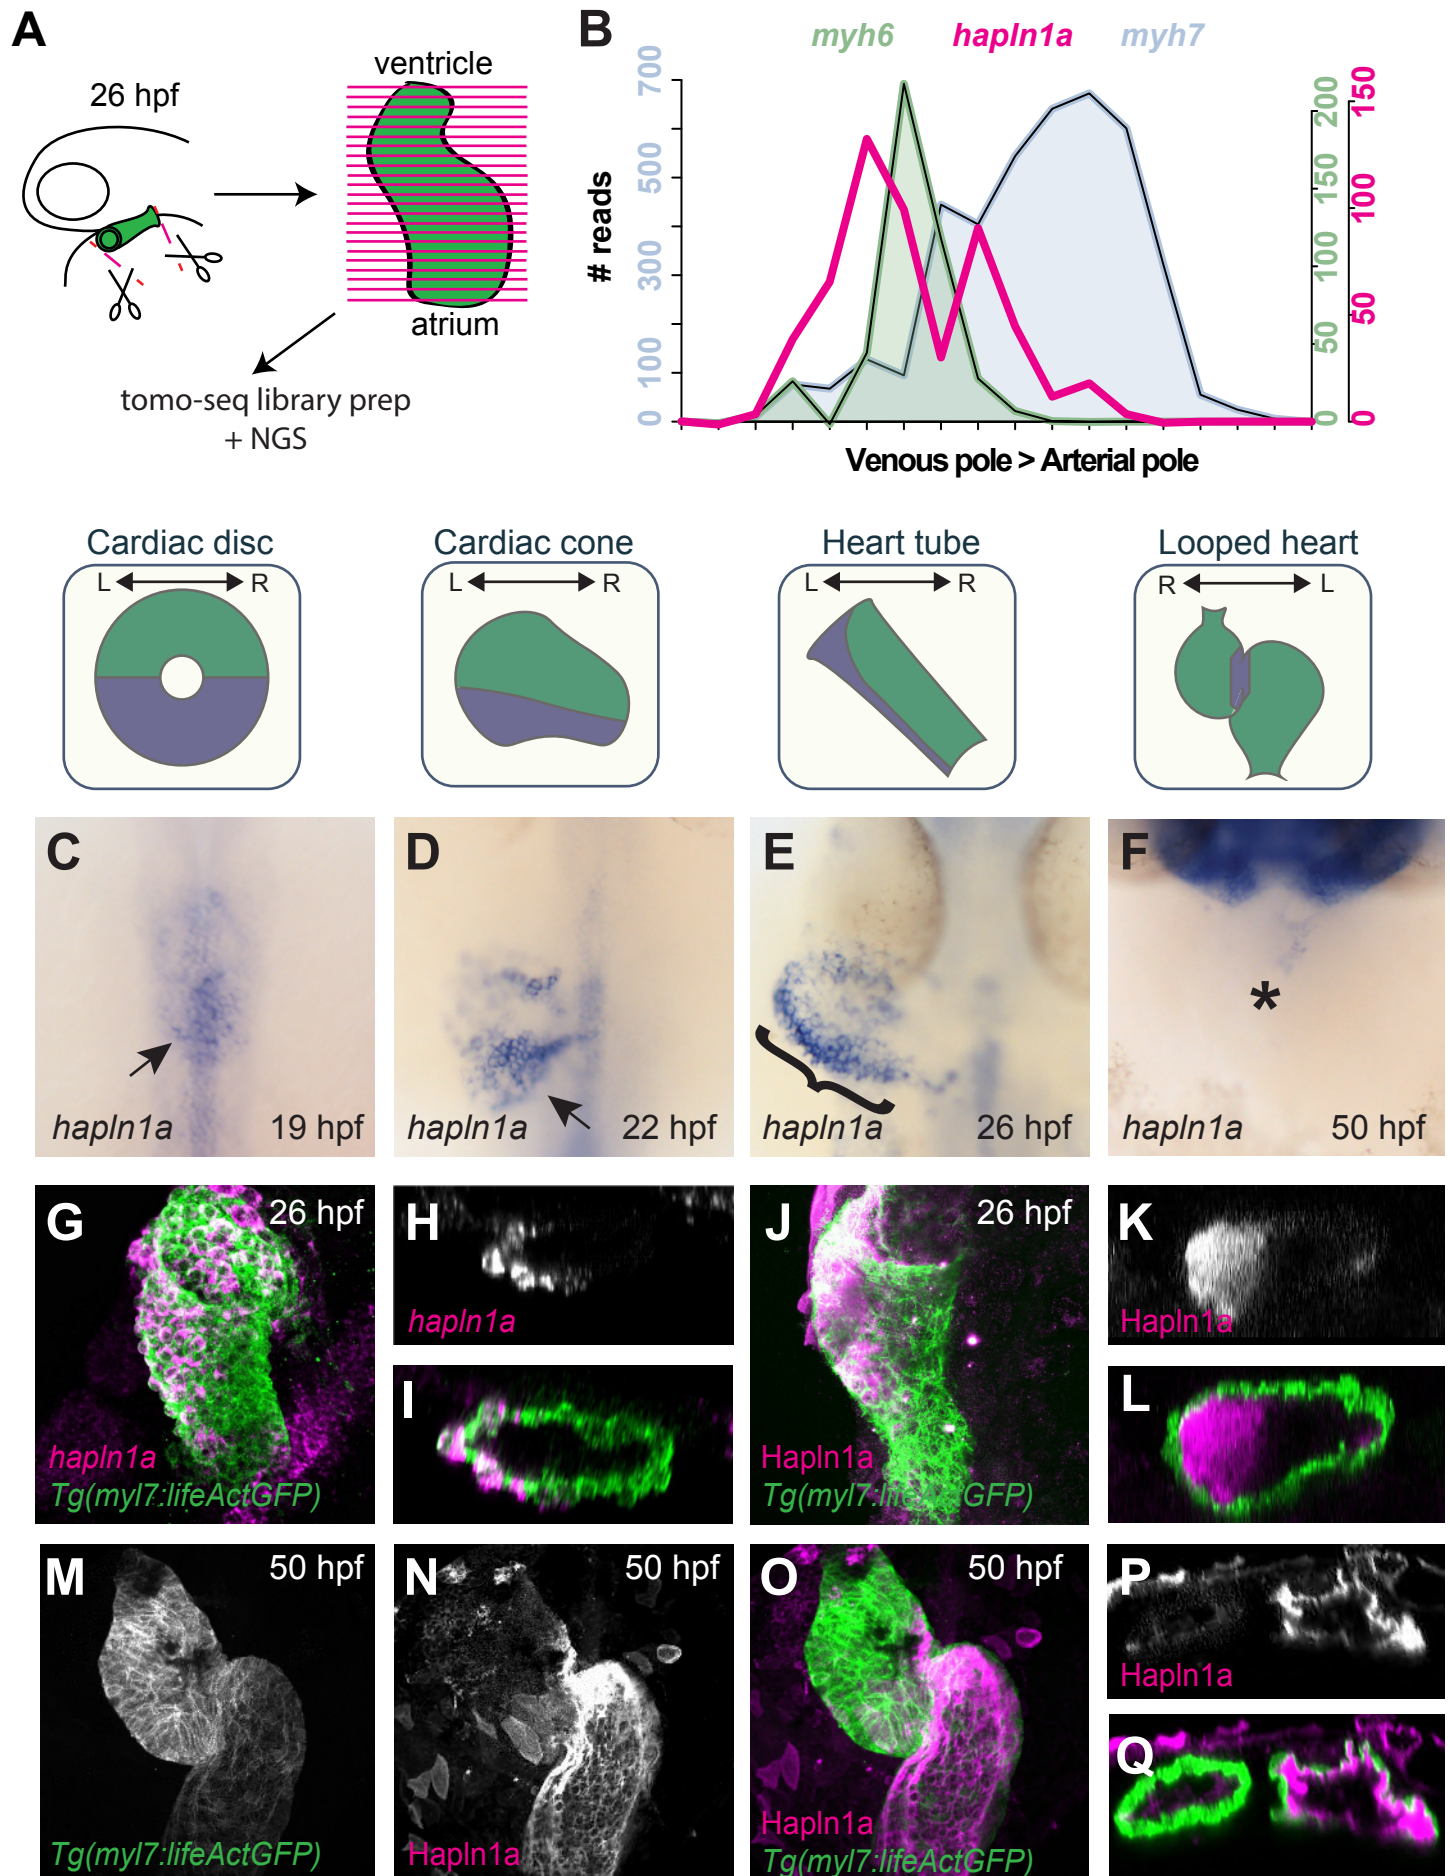

# Figure 3. *Hapln1a* promotes atrial growth and heart morphogenesis

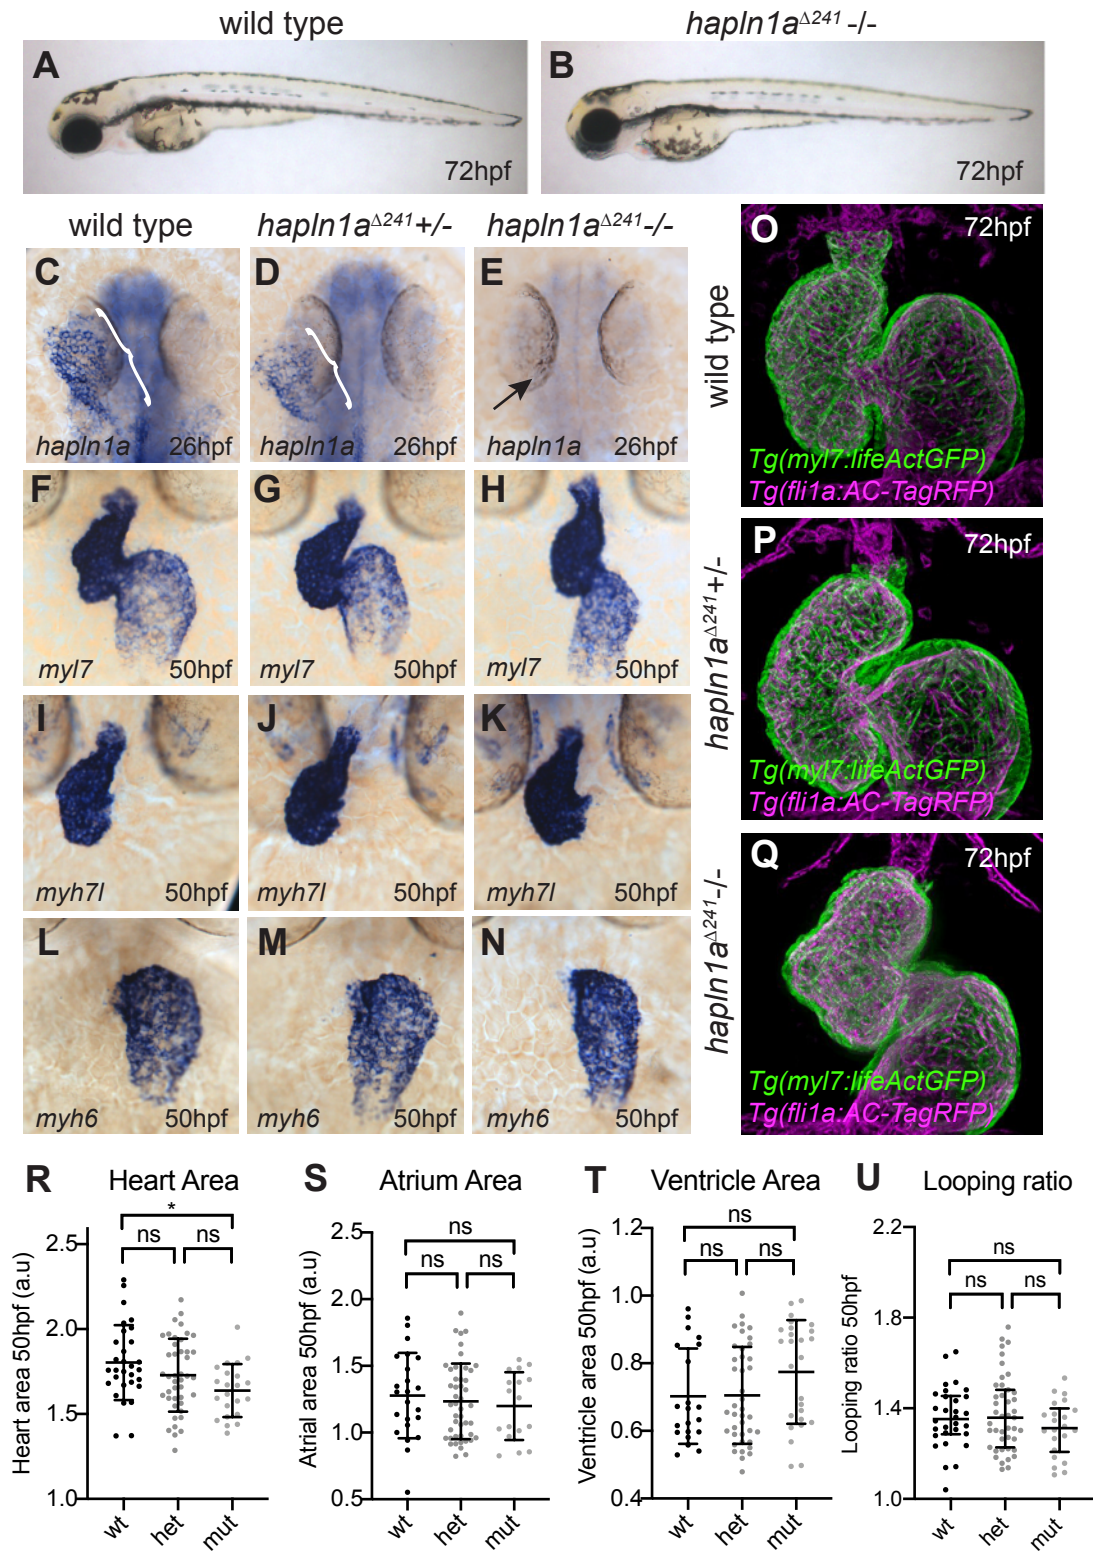

## Figure 4 - *Hapln1a* drives regionalised ECM expansion

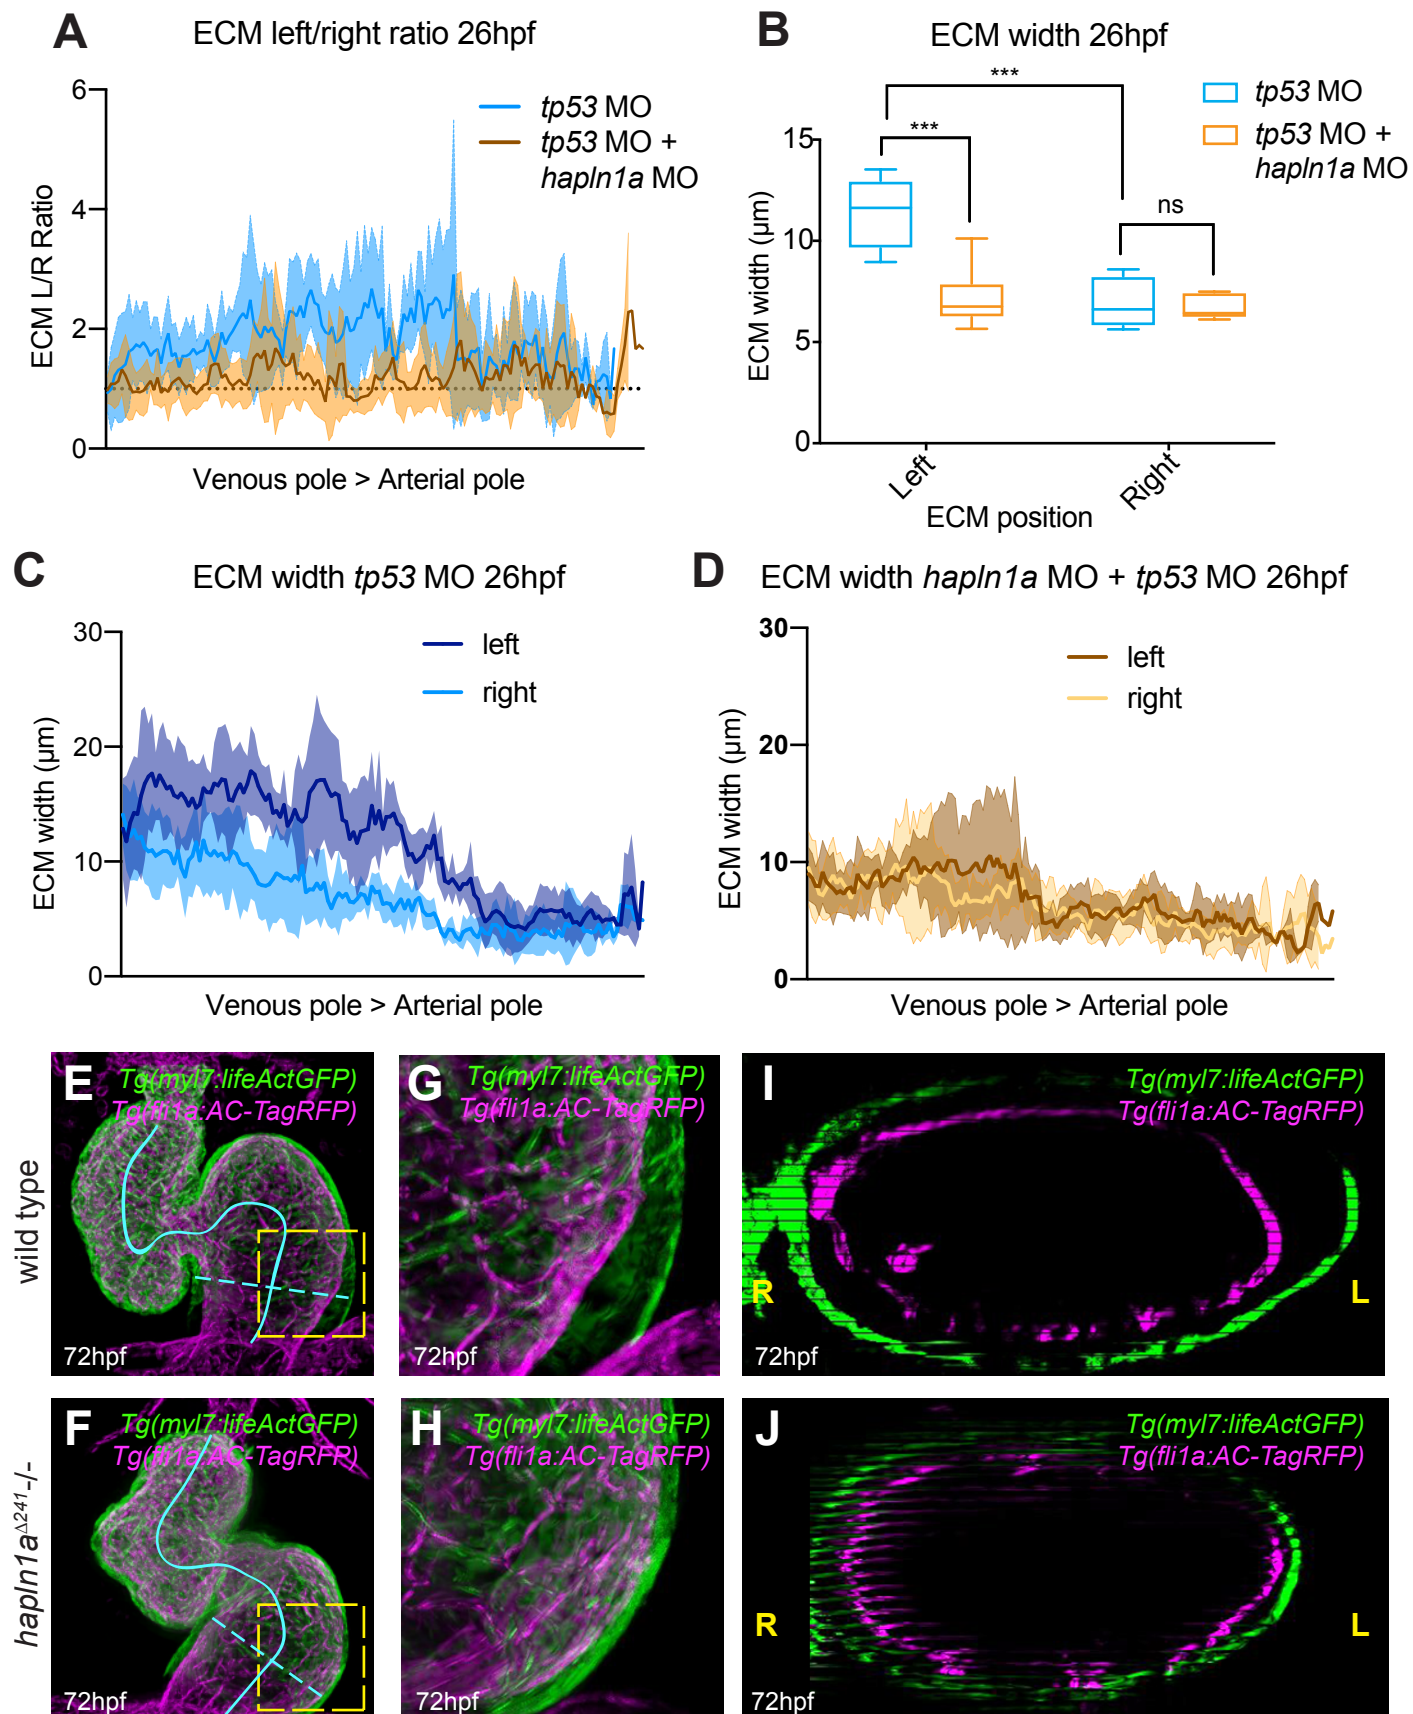



## Figure 5 - Regionalised *hapln1a* expression in the atrium promotes heart morphogenesis

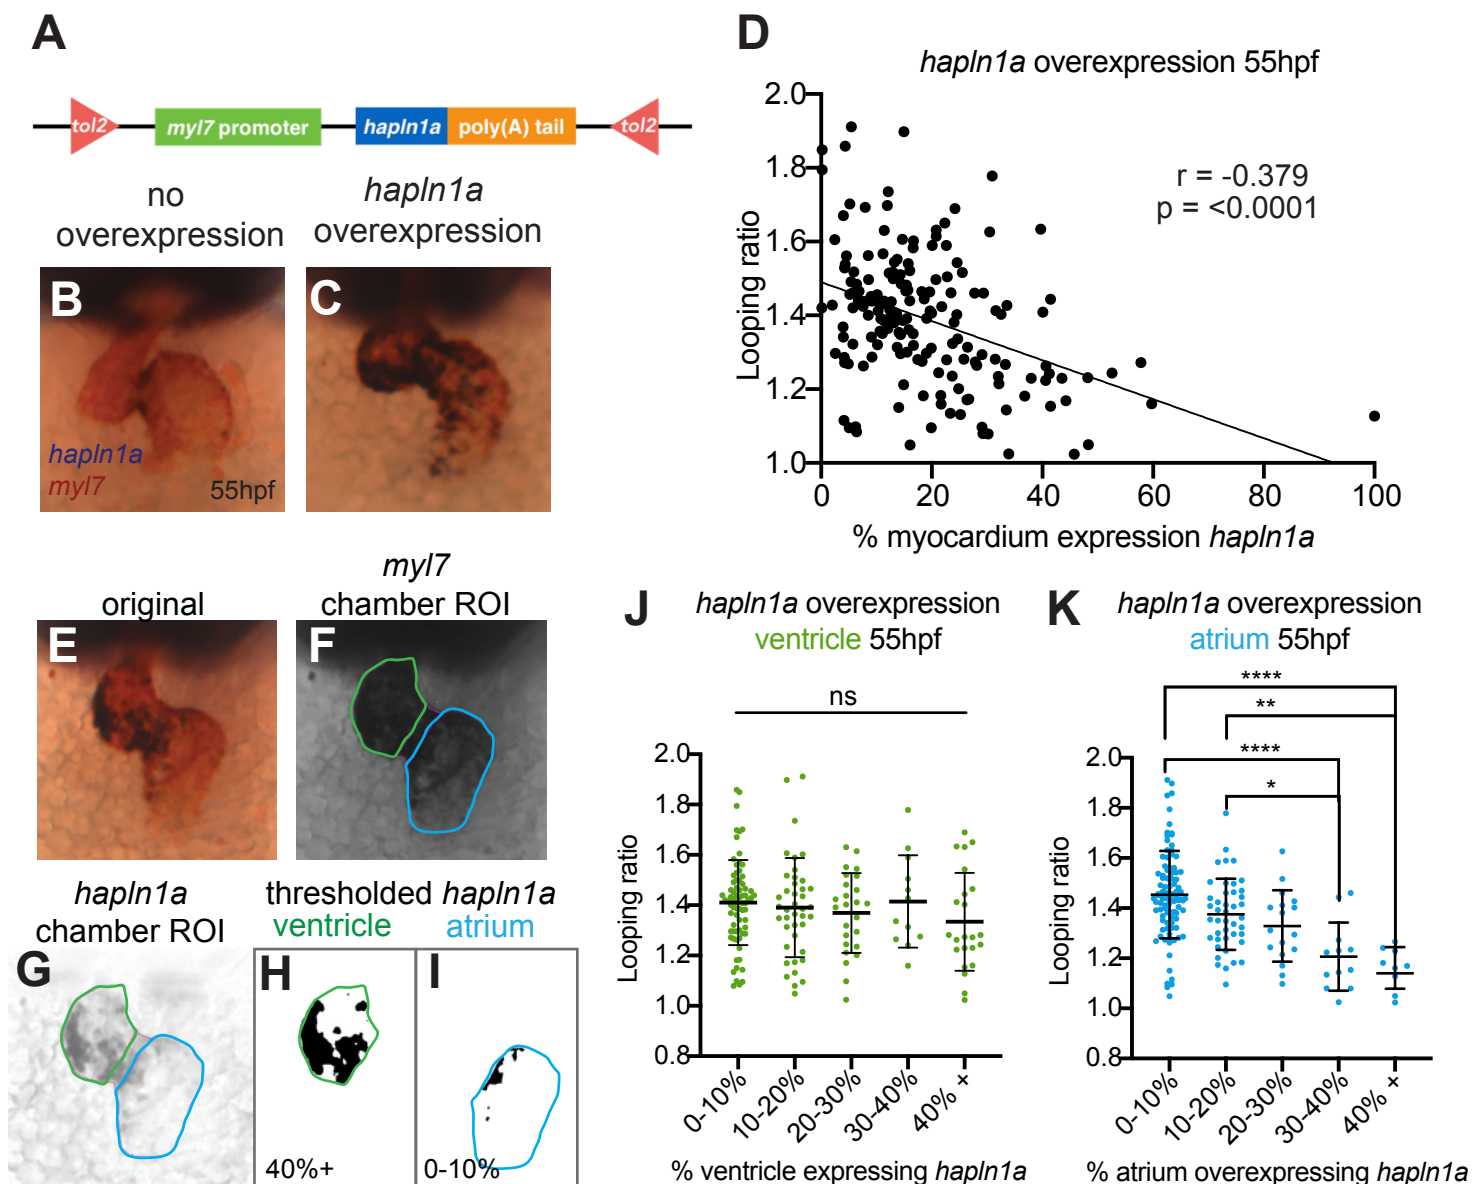

## Figure 6 - Posterior up-regulation of *hapln1a* in the cardiac disc is independent of left-right asymmetry

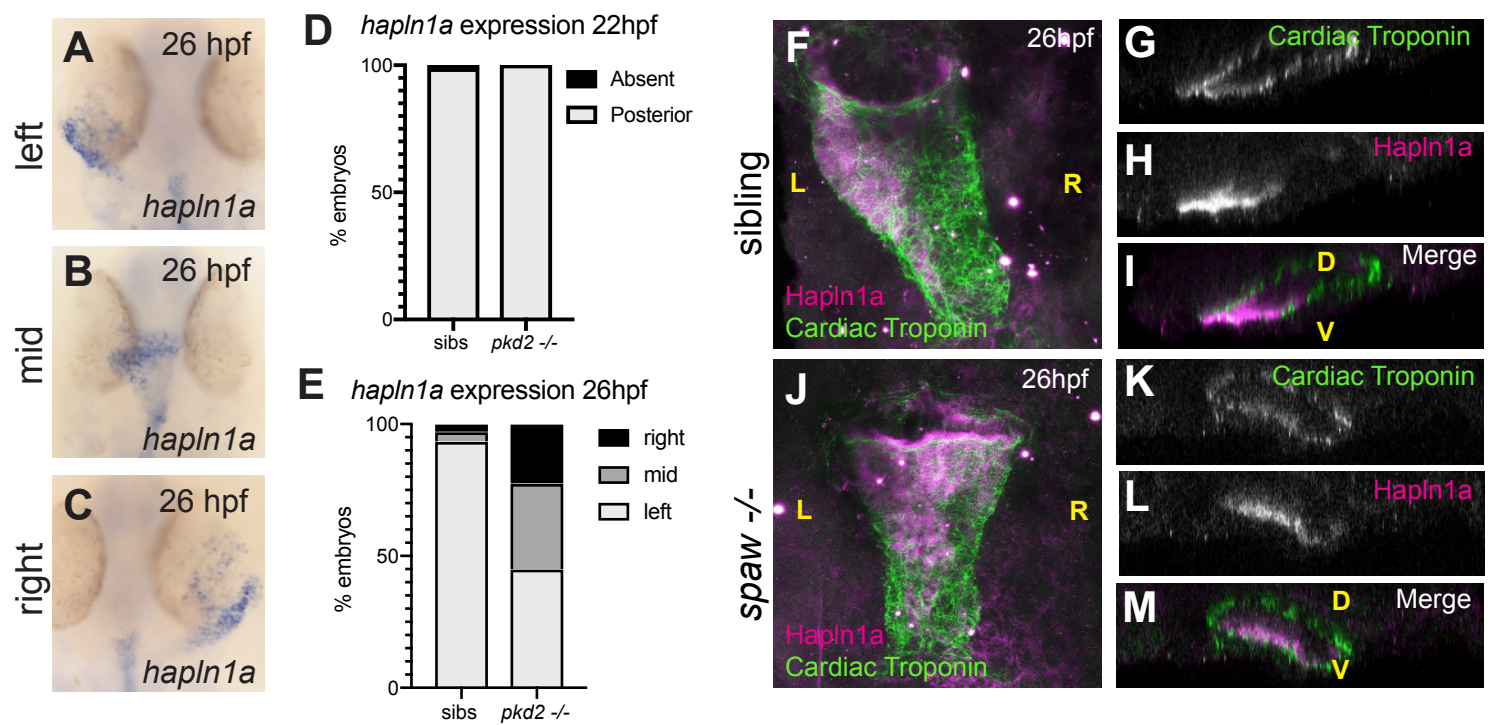

### N LATERALITY INDEPENDENT

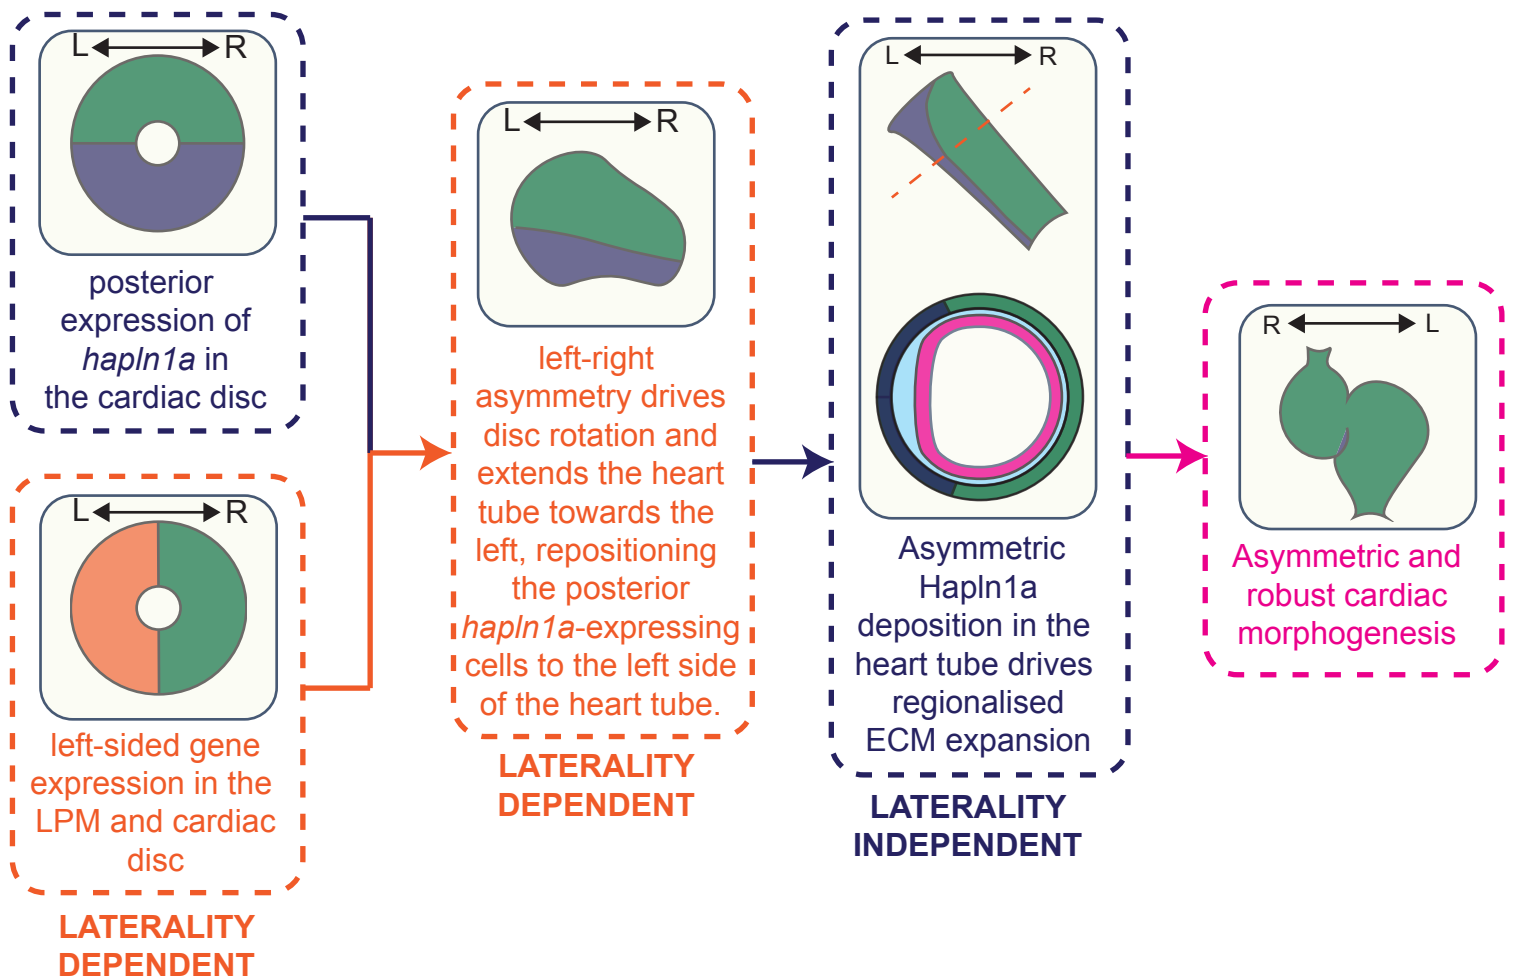

Source: https://www.biorxiv.org/content/10.1101/838128v1.full.pdf
